1 **Bacterial glycocalyx integrity drives multicellular swarm biofilm dynamism**

2

3

4 Fares Saïdi<sup>1,2,†</sup>, Nicolas Y. Jolivet<sup>1,2,†</sup>, David J. Lemon<sup>3</sup>, Arnaldo Nakamura<sup>1</sup>,

5 Anthony G. Garza<sup>3</sup>, Frédéric J. Veyrier<sup>1</sup>, Salim T. Islam<sup>1,2\*</sup>

6

7 <sup>1</sup> Institut National de la Recherche Scientifique (INRS) — Centre Armand-Frappier Santé

8 Biotechnologie, Université du Québec, Institut Pasteur International Network, Laval, QC,

9 Canada

10 <sup>2</sup> PROTEO, the Quebec Network for Research on Protein Function, Engineering, and

11 Applications, Université Laval, Quebec, QC, Canada

12 <sup>3</sup> Department of Biology, Syracuse University, Syracuse, NY, USA

13

14 <sup>†</sup>equal contribution

15 <sup>\*</sup>corresponding author

16

17 Salim T. Islam

18 E-mail: [salim.islam@inrs.ca](mailto:salim.islam@inrs.ca)

19 Phone: (+1) 450-687-5010 ext. 8897

20 **ABSTRACT**

21 Bacterial surface exopolysaccharide (EPS) layers are key determinants of biofilm  
22 establishment and maintenance, leading to the formation of higher-order 3D structures conferring  
23 numerous survival benefits to a cell community. In addition to a specific EPS glycocalyx, we  
24 recently revealed that the social  $\delta$ -proteobacterium *Myxococcus xanthus* secretes a novel  
25 biosurfactant polysaccharide (BPS), with both EPS and BPS polymers required for type IV pilus  
26 (T4P)-dependent swarm expansion via spatio-specific biofilm expression profiles. Thus the  
27 synergy between EPS and BPS secretion somehow modulates the multicellular lifecycle of *M.*  
28 *xanthus*. Herein, we demonstrate that BPS secretion functionally-activates the EPS glycocalyx  
29 via its destabilization, fundamentally altering the characteristics of the cell surface. This impacts  
30 motility behaviours at the single-cell level as well as the aggregative capacity of cells in groups  
31 via EPS fibril formation and T4P assembly. These changes modulate structuration of swarm  
32 biofilms via cell layering, likely contributing to the formation of internal swarm polysaccharide  
33 architecture. Together, these data reveal the manner by which the interplay between two  
34 secreted polymers induces single-cell changes that modulate swarm biofilm communities.

## 35 INTRODUCTION

36 The detection of glycocalyxes surrounding bacterial cells remains a seminal discovery in  
37 bacterial physiology, giving rise to the biofilm concept for surface-attached microbial  
38 community growth within a polysaccharide matrix (1). Within a biofilm, bacteria can physically  
39 interact, be protected from external stressors (e.g. antibiotics, reactive oxygen species,  
40 dehydration, etc.), replicate, communicate via secreted signals, and differentiate their functions  
41 (2, 3). While the importance of secreted polysaccharides for biofilm formation is widely  
42 appreciated, the mechanisms by which these polymers promote 3D matrix structuration and the  
43 cellular organization within are areas of intense study (4).

44 Robust biofilm existence is exemplified by the social multicellular lifecycle of  
45 *Myxococcus xanthus*, a predatory Gram-negative  $\delta$ -proteobacterium (2, 5, 6). Groups of *M.*  
46 *xanthus* cells are encased within a secreted polysaccharide matrix, promoting intimate contacts.  
47 On surfaces, swarms of such cells are able to cooperatively predate prey microorganisms,  
48 saprophytically feeding on the degradation products. When nutrients become scarce, *M. xanthus*  
49 cells within a swarm biofilm secrete a signalling molecule that accumulates to a certain local  
50 threshold above which the developmental program is initiated, leading to the aggregation of  
51 thousands of cells and the formation of fruiting bodies. Functional differentiation within the  
52 swarm leads to three subpopulations, namely (i) myxospore-forming cells within the fruiting  
53 body lumen, (ii) peripheral rods that remain at the base of the fruiting body, and (iii) motile  
54 foragers that continue their outward trajectory from the initial aggregate (7).

55 Two motility systems are required to effectuate these complex physiological outcomes,  
56 with each being differentially active depending on the nature of the substratum. On hard  
57 surfaces, gliding (i.e. “adventurous” [A]) motility predominates, mediated by substratum

58 coupling and directed transport of the trans-envelope Agl–Glt machinery at bacterial focal  
59 adhesion (bFA) sites (8-10). On soft substrata, cell groups move via type IV pilus (T4P)-  
60 dependent (i.e. “social” [S]) motility (11, 12). As a result of these complimentary systems, *M.*  
61 *xanthus* forms highly structured, yet dynamic, biofilms. On hard substrata, *M. xanthus* swarm  
62 biofilms expand along a radial vector as well as vertically away from the substratum, resulting in  
63 the formation of stratified cell layers (13, 14). Cells within each layer are motile, densely  
64 packed, and aligned along their long axes, displaying the properties of an active nematic liquid-  
65 crystal state of matter (15). This stratification on hard surfaces may require a functional gliding  
66 motility apparatus capable of coupling to an external contacting surface (e.g. the substratum  
67 and/or adjacent cells) as layer formation is severely compromised when the substratum-coupling  
68 adhesin of the Agl–Glt apparatus (CglB) is absent (10, 13). Prolonged incubation in such  
69 biofilms can lead to cells becoming connected via a network of outer-membrane vesicle (OMV)  
70 chains and OM tube (OMT) projections (16). In contrast, knowledge of internal swarm  
71 architecture on soft substrata is more limited. Of note, the leading edge of such swarms was  
72 shown via electron microscopy to contain discreet bundles of aligned cells, encased in  
73 Ruthenium Red-stained structures termed polysaccharide “microchannels” (17).

74         Several long-chain sugar polymers are synthesized by *M. xanthus* in order to modulate its  
75 complex lifecycle (18). For cells in development undergoing sporulation, the major spore coat  
76 (MASC) polymer is produced to surround myxospores in a protective layer (19, 20). For non-  
77 sporulating cells, motility is affected by O-antigen-capped LPS (21-23), as well as a poorly  
78 understood “slime” polymer that is proposed to promote adhesion of the Agl–Glt gliding  
79 complex to the underlying surface, and which is left behind in trails following transit of gliding  
80 cells (24, 25). In addition, the bacterium synthesizes exopolysaccharide (EPS); this is a specific

81 secreted sugar polymer required for T4P-dependent swarm spreading, which inhibits natural  
82 transformation and constitutes the principal matrix polysaccharide in *M. xanthus* biofilms (26-  
83 31). Recently, we reported that *M. xanthus* also synthesizes and secretes a novel biosurfactant  
84 polysaccharide to the extracellular milieu that is essential for T4P-dependent swarm spreading  
85 (32). Within an expanding swarm biofilm, BPS biosynthetic machinery is more highly  
86 expressed in the swarm centre, whereas EPS biosynthetic machinery is more highly expressed at  
87 the swarm periphery, pointing to spatially-distinct roles for each polysaccharide in the  
88 maturation of multicellular swarm biofilms (32).

89       Each of EPS, BPS, and MASC is synthesized by a separate Wzx/Wzy-dependent  
90 pathway, with each respective component given the suffix X (exopolysaccharide), B  
91 (biosurfactant), or S (spore coat) (32-35). Individual polysaccharide repeat units in such  
92 pathways are assembled on the lipid carrier undecaprenyl pyrophosphate (UndPP) at the  
93 cytoplasmic leaflet of the inner membrane (IM), followed by processing via a suite of integral  
94 IM proteins (36). Repeat units bound to UndPP are first transported across the IM by the Wzx  
95 flippase (37-40). UndPP-linked repeats in the periplasmic leaflet of the IM are then polymerized  
96 by Wzy (41-43), to modal lengths specified by Wzz/Wzc polysaccharide co-polymerase (PCP)  
97 proteins (41). BPS-pathway WzcB is of the PCP-2A class (44) as it contains an attached  
98 cytosolic bacterial tyrosine autokinase (BYK) domain (32, 45, 46). Conversely, EPS- and  
99 MASC-pathway WzcX and WzcS (respectively) are of the PCP-2B class as they do not encode a  
100 fused BYK domain; instead, these pathways encode standalone WzeX/S BYK proteins (32, 47)  
101 for association with their cognate WzcX/S PCP. In turn, Wzb bacterial tyrosine phosphatase  
102 (BYP) proteins are also encoded to control the phosphorylation state of PCP-2A Wzc proteins  
103 and PCP-2B-associated Wze proteins (48). The *M. xanthus* Wzb BYP (PhpA) has been shown

104 to dephosphorylate BYK WzeS as well as the BYK domain of WzcB (49), implicating Wzb in  
105 MASC and BPS biosynthesis. The cytosolic (de)phosphorylation states of PCP-2A Wzc and  
106 PCP-2B-associated Wze proteins control not only polymer modal length modulation, but also  
107 secretion of the respective heteropolysaccharide across the OM via the Wza translocon (50, 51).

108 A range of activators and inhibitors are known to impact *M. xanthus* EPS biosynthesis  
109 (reviewed in (18)), with the Dif chemosensory pathway the most noteworthy (52-54). Positive  
110 regulation of EPS production is mediated by (i) the methyl-accepting chemotaxis protein DifA,  
111 (ii) the CheW-like coupling protein DifC, (iii) the CheA-like histidine kinase DifE, and (iv) the  
112 EpsW response regulator (phosphorylated by DifE) (55-57). Conversely, EPS production is  
113 negatively regulated by (i) the DifD response regulator, (ii) the CheC-like phosphatase DifG, and  
114 (iii) Nla19, an NtrC-like transcriptional regulator (54, 58). Despite these details, the specific  
115 functional links between the Dif pathway and the Wzx/Wzy-dependent EPS biosynthesis system  
116 have yet to be identified.

117 While the biosurfactant nature of BPS was previously demonstrated, the mechanism by  
118 which it promotes swarm structuration and T4P-dependent spreading was not known (32).  
119 Herein, we provide evidence/demonstrate that unlike conventional biosurfactants — which  
120 typically function as wetting agents secreted at colony fronts to condition the substratum and  
121 promote spreading — a major role of BPS is to change the activation state of the EPS surface  
122 glycocalyx. This impacts cell-level and community-scale behaviours leading to altered  
123 multicellular outcomes.

## 124 RESULTS

### 125 *BPS*<sup>-</sup>-deficient *M. xanthus* cells are hyper-aggregative

126        Though BPS<sup>-</sup> and EPS<sup>-</sup> swarms were previously shown to be compromised for T4P-  
127 dependent swarm expansion — with the former elaborating a fuzzy morphology and the latter a  
128 smooth phenotype — under nutrient limitation BPS<sup>-</sup> cells were still able to aggregate and form  
129 spore-filled fruiting bodies, similar to WT (but not EPS<sup>-</sup>) swarms (32) (**Fig. 1**). However, the  
130 developmental transition to fruiting bodies for BPS<sup>-</sup> swarms could take place at lower initial cell  
131 densities compared to WT swarms, suggesting that cells may aggregate more efficiently in BPS<sup>-</sup>  
132 swarms (32). To specifically probe aggregative differences among *M. xanthus* cell-surface  
133 polysaccharide mutants, the real-time ability of cells to auto-aggregate in liquid media was  
134 compared, a phenomenon known to be dependent on the presence of cell-surface EPS and an  
135 extendable T4P (22, 26, 30, 33, 55, 56, 58-68). While both EPS<sup>-</sup> and T4P<sup>-</sup> cells remained in  
136 suspension, BPS<sup>-</sup> cells rapidly auto-aggregated by the first post-mixing time point (10 min),  
137 resulting in faster initial unaided sedimentation relative to WT cells; after ~40 min, WT and  
138 BPS<sup>-</sup> cells in rich media continued to sediment, but at comparable rates, consistent with  
139 continued metabolism (**Fig. 2A**). The same rapid auto-aggregation phenotype at the same post-  
140 mixing time point (10 min) was observed for BPS<sup>-</sup> cells (relative to WT) under non-  
141 metabolizing conditions in minimal buffer, with the auto-aggregation levelling off at ~40 min  
142 (**Fig. 2B**). Together, these cell-level hyper-aggregation data (i) help explain fruiting body  
143 formation for BPS<sup>-</sup> swarms at lower cell densities (32), (ii) suggest that T4P may indeed be  
144 extendable in BPS<sup>-</sup> cells, and (iii) are consistent with differences in the general surface  
145 properties of BPS<sup>-</sup> cells.

146 ***BPS-deficient M. xanthus cells can extend T4P***

147 To directly probe T4P assembly, WT, BPS<sup>-</sup> and EPS<sup>-</sup> cells from liquid culture were  
148 analyzed via transmission electron microscopy (TEM). As expected, from the poles of WT cells,  
149 numerous T4P projections could be observed, including both thin filaments (likely single pili)  
150 and thick filaments (likely bundles of pili); the presence of T4P bundles is supported by the  
151 observation that at certain points along the thick filament, branching occurred, with the new  
152 offshoots resembling thin filaments (**Fig. 2C**). While no EPS<sup>-</sup> cells were observed with attached  
153 T4P projections emanating from a cell pole, thin T4P-like filaments were detected on the grid  
154 (**Fig. 2C**). This may suggest that EPS<sup>-</sup> cells can still assemble a T4P, but that the presence of  
155 cell-surface EPS contributes to strengthening the apparatus. Intriguingly, BPS<sup>-</sup> cells were  
156 observed to extend T4P, but they were not as prevalent as in WT cells; moreover, the T4P  
157 filaments detected in BPS<sup>-</sup> cells were typically shorter than those in WT cells, and not found in  
158 presumed thick T4P bundles (**Fig. 2C**). Thus while BPS<sup>-</sup> cells can still extrude T4P projections,  
159 the assembly of these apparatus appears to be compromised relative to WT cells, helping to  
160 explain the deficiency in T4P-dependent motility in BPS<sup>-</sup> cells (**Fig. 1**) (32).



161 ***Increased Trypan Blue-retention by BPS<sup>-</sup> cells is inconsistent with EPS overproduction***

162 Retention of Trypan Blue dye is used as a readout for *M. xanthus* cell-surface EPS levels  
163 (30, 58, 69). Intriguingly, despite compromised T4P-dependent swarm spreading (32, 33), BPS-  
164 pathway mutants  $\Delta wzcB$ ,  $\Delta wzcB_{BYK}$ ,  $\Delta wzaB$ , and  $\Delta wzaB \Delta wzcB$  — in which periplasmic BPS  
165 polymerization should be permitted but secretion compromised — reproducibly bound more  
166 Trypan Blue than WT cells (combined interquartile range of 102–133% of WT) (**Fig. 2D**) (32).  
167 This dye-retention difference was manifested despite equivalent levels of the same cell-  
168 associated EPS sugars detected in WT and BPS<sup>-</sup> cells (32). However, the abovementioned four  
169 BPS-pathway mutant strains still bound significantly less Trypan Blue than the  $\Delta difG$  strain  
170 (interquartile range of 113–202% of WT) (**Fig. 2D**). The latter is a mutant in the Dif  
171 chemosensory pathway in which EPS production is no longer negatively-regulated, resulting in  
172 increased EPS production; this is compared to a  $\Delta difE$  strain in which EPS production is  
173 downregulated (**Fig. 2D**) (55, 56, 58, 70). In fact, EPS overproduction does not significantly  
174 compromise T4P-dependent swarm spreading relative to a BPS deficiency (**Fig. 1B**), which  
175 severely impairs swarm spreading (32). Taken together with the comparative dye-retention  
176 analyses of EPS regulatory mutants (**Fig. 2D**), these data are consistent with the elevated  
177 retention of Trypan Blue by the abovementioned BPS-pathway mutants not being due to EPS  
178 overproduction. Instead, this may point to differences in surface properties between WT and  
179 BPS<sup>-</sup> cells.

180 ***BPS deficiency decreases the relative cell-surface hydrophobicity of M. xanthus***

181 To probe the physical properties of WT and BPS<sup>-</sup> cell surfaces, both strains were  
182 subjected to MATH (microbial adhesion to hydrocarbons) testing to probe relative differences in  
183 cell-surface hydrophobicity (71). Cells of either strain were resuspended in (aqueous) liquid  
184 medium and mixed with the hydrocarbon hexadecane, after which the emulsion was allowed to  
185 clear (72). The rationale herein is that the greater the cell-surface hydrophobicity of a particular  
186 strain, the more cells removed from suspension through hydrophobic contacts with hexadecane,  
187 thus decreasing the turbidity of the suspension (71). Compared to OD<sub>600</sub> readings taken before  
188 hexadecane addition-and-mixing, significantly fewer WT cells remained in suspension (i.e.  
189 lower OD<sub>600</sub>) following emulsion separation compared to BPS<sup>-</sup> cells (**Fig. 2E**). These findings  
190 do not indicate that WT cells are hydrophobic per se, but rather that the WT cell surface is  
191 relatively more hydrophobic compared to that of BPS<sup>-</sup> cells. Therefore, BPS secretion increases  
192 the relative hydrophobicity of the *M. xanthus* cell surface. Moreover, this dataset further  
193 supports the designation of BPS as a biosurfactant since biosurfactants have been extensively  
194 reported to change the relative cell-surface hydrophobicity of various bacterial cells (73).  
195 Finally, the reduced relative cell-surface hydrophobicity of BPS<sup>-</sup> cells may help explain the  
196 higher-than-WT amounts of hydrophilic Trypan Blue binding observed for the  $\Delta wzcB$ ,  
197  $\Delta wzcB_{BYK}$ ,  $\Delta wzaB$ , and  $\Delta wzaB \Delta wzcB$  mutants previously described (**Fig. 2D**) (32).

198 ***BPS secretion is required for EPS surface-fibril formation***

199           Given the multiple datasets pointing towards fundamental cell-surface differences  
200 between WT and BPS<sup>-</sup> cells (**Fig. 2A-E**), surface morphologies for these strains (as well as EPS<sup>-</sup>  
201 cells) were directly visualized via scanning electron microscopy (SEM). Consistent with  
202 previous reports, WT cells were shown to be connected via networks of EPS fibrils, while EPS<sup>-</sup>  
203 cells lacked any such connections (16, 55, 63, 74-79) (**Fig. 2F**). Interestingly, while BPS<sup>-</sup> cells  
204 still produce EPS (32) (**Fig. 2D**), no inter-cell fibril networks were observed for this strain (**Fig.**  
205 **2F**). This may indicate that while EPS by itself is tightly held by individual cells, the secretion  
206 of BPS serves to sufficiently destabilize or loosen the cell-surface EPS glycocalyx, thus  
207 promoting fibril formation and inter-cell connections.

208 ***EPS glycocalyx destabilization impacts single-cell behaviour***

209         Since BPS<sup>-</sup> cells are capable of forming fruiting bodies (**Fig. 1A**) (32), this suggests that  
210 BPS<sup>-</sup> cells can still perform single-cell gliding motility, which is required for efficient fruiting  
211 body formation (80). For swarms grown on hard 1.5% agar, flare projections were observed  
212 emanating from the edge of the inoculated spot, a tell-tale sign of gliding motility by BPS<sup>-</sup> cells  
213 (**Fig. 1A**). By way of severe oblique illumination of the samples, we were also able to visualize  
214 the furrow network left behind in the agar by lead gliding cells at the swarm edge (**Fig. 1A**).  
215 Previously revealed in detail by others using 3D profilometry, these physical depressions in the  
216 agar substratum were revealed to be the source of phase-bright trails classically attributed to  
217 slime deposition by *M. xanthus* cells gliding on agar (81). All strains tested produced furrows,  
218 indicating that the presence or absence of EPS and/or BPS does not qualitatively impact the  
219 formation of these substratum depressions. Moreover (while not possible to distinguish between  
220 single cells and cell groups), additional cells were detected following the path of the various  
221 furrows (**Fig. 1A**), supporting the notion of sematectonic stigmergic coordination for the  
222 phenomenon of trail following by *M. xanthus* cells on agar (82). At the single-cell level, the  
223 presence of a compacted surface glycocalyx in BPS<sup>-</sup> cells, or the complete absence of this layer  
224 in EPS<sup>-</sup> cells, resulted in faster gliding motility than in WT cells (**Fig. 3A**). Compared to BPS<sup>-</sup>  
225 or EPS<sup>-</sup> cells, this may indicate that the bulk volume of the destabilized EPS surface layer in WT  
226 cells adversely affects gliding efficiency.

227         We next probed the frequency at which single cells reversed their gliding direction. Cells  
228 were imaged at 30 s intervals for 50 frames. To avoid unintentionally lowering reversal  
229 frequency averages (by including cells tracked for a short time in which a reversal may not have  
230 yet manifested), we only analyzed cells continuously tracked for 30 or more frames. Cells

231 deficient in EPS secretion were observed to reverse their gliding direction less frequently  
232 compared to WT cells (**Fig. 3B**), consistent with previous reports of lower reversal frequencies in  
233 Dif-pathway mutants in which EPS production is compromised (68, 83). Conversely, BPS<sup>-</sup> cells  
234 were found to reverse their gliding direction more frequently than WT cells (**Fig. 3B**). Together,  
235 these data point to not only the general importance of EPS in regulating reversal frequency, but  
236 also its “activation state” as determined by the effects of BPS.

237         Given the differences in single-cell gliding behaviours described above, we examined the  
238 polymertropism responses of EPS<sup>-</sup> and BPS<sup>-</sup> cells. Polymertropism is a gliding motility-  
239 dependent process. It is measured via changes of the swarm aspect ratio, i.e. comparisons of  
240 changes in “east–west” expansion vs “north–south” expansion on an agar plate in response to the  
241 insertion of a small length of tubing between the edge of the agar and the “northern” wall of the  
242 Petri dish. The net effect of this agar compression is to align the polymers in the substratum  
243 matrix, allowing *M. xanthus* and other bacteria to preferentially spread in the “east–west”  
244 direction of the aligned substratum polymers (10, 84-86). While no significant differences in  
245 polymertropism responses were detected between WT and EPS<sup>-</sup> swarms, BPS<sup>-</sup> swarms  
246 demonstrated a remarkably enhanced capacity to spread in the “east–west” direction on  
247 compressed agar (**Fig. 3C**). This is the first known description of a hyper-polymertropic *M.*  
248 *xanthus* strain. While specific cellular factors contributing to the polymertropism response  
249 remain poorly understood, our data suggest that the presence of EPS as well as increased gliding  
250 speed may contribute to this enhanced “east–west” swarm expansion in response to mechanical  
251 changes in the substratum. The secretion of BPS thus affects *M. xanthus* behaviours at multiple  
252 levels of biological organization, from entire communities down to single cells.

253 ***BPS secretion is required for cell stratification within swarms***

254 We next sought to probe potential ultrastructural differences in swarm architecture  
255 leading to compromised T4P-dependent colony expansion. To highlight internal structures as  
256 per a previous report (17), spreading swarms were treated with Ruthenium Red, a polycationic  
257 dye that interacts with a range of polyanionic targets (87). This was carried out for swarms of  
258 WT, as well as the isogenic EPS<sup>-</sup>, BPS<sup>-</sup>, and MASC<sup>-</sup> mutant strains, followed by negative-stain  
259 TEM of transversely-cut sections near the swarm edge (**Fig. 4, inset**). This resulted in electron-  
260 dense labelling of the *M. xanthus* cell surface in the absence of EPS, BPS, or MASC secretion  
261 (**Fig. 4**). These analyses also revealed pronounced horizontal electron-dense structures  
262 separating stratified layers of WT and MASC<sup>-</sup> cells, with such structures largely absent in BPS<sup>-</sup>  
263 swarms and nonexistent in EPS<sup>-</sup> swarms (**Fig. 4**). Vertical striations of this electron-dense  
264 material — connecting horizontal electron-dense structures above and below to form a self-  
265 contained so-called “microchannel” — were not detected (**Fig. 4**). The rod-shaped cells within  
266 the layered WT and MASC<sup>-</sup> swarms, as well as the more irregularly-packed BPS<sup>-</sup> swarm, were  
267 highly aligned along their long axes in the direction of migration, resulting in the round  
268 appearance of cells in the cross sections (**Fig. 4**). Cells in BPS<sup>-</sup> swarms were also more closely-  
269 packed together compared to either WT, MASC<sup>-</sup>, or EPS<sup>-</sup> swarms (**Fig. 4**).

270 Higher-magnification views of the horizontal electron-dense ribbons revealed these  
271 structures to be of heterogeneous composition; in addition to wispy material which could  
272 represent one or more accumulated polysaccharide species, enrichments of individual OMVs as  
273 well as OMV chains were also observed at these sites (**Fig. 4**).

274 Taken together, these data suggest that the horizontal electron-dense structures (**Fig. 4**)  
275 are not required for nematic alignment of cells in these swarms. Furthermore, the close packing

276 of cells in BPS<sup>-</sup> swarms is consistent with BPS<sup>-</sup> cells being more highly aggregative (**Fig.**  
277 **2A,B**), forming fruiting bodies at lower initial cell densities (32), and displaying more compact  
278 surface EPS glycoalyces lacking fibril structures (**Fig. 2F**). Finally, the accumulation of various  
279 types of material at these horizontal electron-dense ribbons (**Fig. 4**) raises the possibility that  
280 these striations are, in essence, exclusion boundaries between different layers of *M. xanthus* cells  
281 within a swarm. Further comment on the nature of these horizontal electron-dense structures can  
282 be found in the Discussion below.

283 **DISCUSSION**

284 Originally referred to as “slime fibrils/fibers”, sinewy structures connecting the surfaces  
285 of clustered *M. xanthus* cells have been known for >40 years (88, 89), with the only known  
286 requirement being the presence of the cell-surface EPS glycocalyx (55, 63, 74, 75, 78). Given  
287 the phenotypic, biochemical, and biophysical data presented herein, we propose that it is not  
288 simply the presence of cell-surface EPS that is required to mediate these inter-cell connections in  
289 *M. xanthus*, but rather the activation state of the EPS glycocalyx induced by the effects of  
290 secreted BPS.

291 Unfortunately, confusion exists throughout the scientific literature on the use of the  
292 abbreviation “EPS”, especially for *M. xanthus* research. Various laboratories (including ours)  
293 use “EPS” to specifically denote the principal matrix polysaccharide assembled and secreted via  
294 the WzxX-WzyX-WzcX-WzeX-WzaX proteins (32, 33, 65). However, “EPS” has also been  
295 used to non-specifically refer to diverse secreted polysaccharides (i.e. “exopolysaccharides”).  
296 For many bacteriologists, “EPS” has even more broadly come to signify “extracellular polymeric  
297 substances”, a term that has come to encompass not only secreted polysaccharides, but also  
298 polypeptides and polynucleotides. Given these various uses, particular attention is required  
299 when interpreting and comparing findings across diverse publications.

300 The data presented herein provide complementary insights into the nature of T4P-  
301 dependent group motility in *M. xanthus* swarm biofilms, as they implicate the importance of BPS  
302 on several levels. Type IV pili in *M. xanthus* are known to interact with cell-surface EPS, which  
303 is how *M. xanthus* cells in rafts are proposed to move together, i.e. a T4P from a given cell is  
304 able to interact with the surface EPS layer on an adjacent cell, triggering T4P retraction, close  
305 cell–cell association, and group movement (26). Previously, single cells were found to move via



306 T4P extension and retraction on polystyrene surfaces, but only in the presence of a viscous  
307 solution of 1% methylcellulose (90, 91). To what exactly then does a *M. xanthus* T4P bind?  
308 Though BPS<sup>-</sup> cells can extend a T4P (**Fig. 2C**), these apparatus were typically shorter, thinner,  
309 and less prevalent than those in WT cells, and it is not known if pili from BPS<sup>-</sup> cells are still able  
310 to interact with the “non-activated” EPS on adjacent BPS<sup>-</sup> cells. Simplistically, the T4P may  
311 need to get stuck within the activated EPS matrix in WT cells, something which might not be  
312 possible in BPS<sup>-</sup> cells. Alternatively, if unable to bind, this could signify that a specific motif on  
313 “activated” EPS needs to be recognized by the T4P, and that this motif is not exposed on the  
314 glycocalyx of BPS<sup>-</sup> cells. Rather than the “stuck-in-goo” hypothesis, additional evidence  
315 supports the latter theory. Specifically, that (i) T4P retraction can be triggered by amine-  
316 containing polysaccharides (26), and (ii) single-cell T4P motility is possible in an aqueous  
317 microfluidic channel atop glass functionalized with a molecular coating of  
318 carboxymethylcellulose (92). The latter principal is analogous to that used for chitosan coatings  
319 in microfluidic chambers to test single-cell gliding motility on glass substrata (24, 93).

320 In addition, BPS secretion alters the fundamental properties of the *M. xanthus* cell  
321 surface, impacting numerous processes. Importantly, an imbalance in the EPS:BPS secretion  
322 ratio in a given cell can alter surface adhesiveness, directly influencing spatiotemporal cell–cell  
323 interaction dynamics, and by extension, swarm biofilm architecture. A greater proportion of  
324 EPS:BPS in  $\Delta wzaB$  cells (i.e. WT levels of EPS, no BPS) results in swarms displaying a fuzzy  
325 morphology on soft agar (32) (**Fig. 1A**). Similarly, robustly increasing the production of EPS (in  
326  $\Delta difG$  cells) may dilute the effect of BPS, resulting in a similar fuzzy swarm morphology (**Fig.**  
327 **1A**), albeit with a larger surface area (**Fig. 1B**).

328           However, BPS<sup>-</sup> cell traits such as increased gliding speed and more frequent reversals  
329 (relative to WT) are more difficult to interpret. Given that EPS<sup>-</sup> cells are not aggregative, the  
330 apparent increased “stickiness” of BPS<sup>-</sup> cells (and presumed stronger association with the  
331 substratum) is not believed to lead to appreciably more efficient substratum-coupling of the Agl–  
332 Glt machinery. As the EPS glycocalyx is likely more compacted in BPS<sup>-</sup> cells, and completely  
333 absent in EPS<sup>-</sup> cells, we speculate that the bulk volume occupied by the BPS-activated EPS  
334 surface layer in WT cells results in suboptimal surface coupling of the gliding machinery.  
335 Conversely, overall increased vs. decreased stickiness of BPS<sup>-</sup> vs. EPS<sup>-</sup> cells (respectively) may  
336 indicate a role for mechanical feedback from physical interactions with the substratum  
337 influencing properties of the Agl–Glt apparatus at bFA sites and/or the Frz chemosensory system  
338 that governs polarity reversals within the cell (94), potentially affecting reversal frequency. The  
339 combined effects of increased gliding speed and potential differences in bFA stability and/or Frz  
340 system activity may also help explain the hyper-polymertropism observed for BPS<sup>-</sup> cells.

341           The detection of internal Ruthenium Red-labelled structures near the swarm edge  
342 presented herein provides important independent support for the overall concept of leading-edge  
343 “microchannels” reported by Berleman and colleagues (17). Differences in the numbers of cells  
344 contained within layer/channel structures could be attributable to minor variations in initial  
345 swarm inoculation (volume, cell density, etc.). However, we remain skeptical of the notion that  
346 the Ruthenium Red-labelled structures are mainly composed of EPS. Ruthenium Red is a  
347 polycationic dye with a well-documented propensity for binding to a range of anionic targets  
348 (87). Originally used as a highly-effective labelling agent for pectin (a galacturonic acid-rich  
349 polysaccharide), the dye has since been shown to also bind other anionic polysaccharides,  
350 phospholipids, DNA, and proteins (87, 95-98). Though a chemical structure has yet to be

351 determined, the composition of *M. xanthus* EPS has been studied across four publications. In  
352 total, arabinose, galactose, *N*-acetyl-galactosamine, glucose, glucosamine, *N*-acetyl-glucosamine,  
353 mannose, *N*-acetyl-mannosamine, rhamnose, and xylose sugars have been reported (32, 77, 99,  
354 100). However, none of these reported EPS sugars carry a net-negative charge that would favour  
355 Ruthenium Red binding; this has lead us to question whether the distinct horizontal ribbons we  
356 detected within WT and MASC<sup>-</sup> swarms (**Fig. 4**), as well as the walls of self-enclosed so-called  
357 “microchannel” structures at the WT swarm edge (17), are indeed composed of *M. xanthus* EPS.

358         Of note, extracellular DNA (eDNA) has been previously detected in *M. xanthus* biofilms  
359 and shown to bind secreted polysaccharides as well as strengthen the extracellular matrix (101).  
360 Moreover, we have herein detected the accumulation of OMVs and OMV chains at the  
361 Ruthenium Red-stained layers, material which by definition contains phospholipids as well as  
362 phosphate groups linked to the Lipid A motif of its LPS (102) (**Fig. 4**). In addition to  
363 polysaccharide, the *M. xanthus* extracellular matrix is also abundant in protein species of largely  
364 unknown functions (77, 103). Most intriguingly, BPS may be a strong candidate for the  
365 principal Ruthenium Red-labelled substance detected in the mid-swarm horizontal ribbons  
366 reported herein (**Fig. 4**) as well as the leading-edge enclosed channel structures previously  
367 reported (17). Consider that the BPS polymer is an acidic heteropolysaccharide built of  
368 repeating tetrasaccharide units; each tetrasaccharide repeat contains a proximal *N*-acetyl-D-  
369 mannosamine, followed by three distal anionic *N*-acetyl-D-mannuronic acid sugars, with the first  
370 three sugars of each repeat being randomly acetylated (32). Furthermore, pronounced  
371 Ruthenium Red-labelled horizontal striations were not detected in BPS<sup>-</sup> swarms (**Fig. 4**). In  
372 addition, compositional analysis of cell-associated sugars as well as surface-active testing of  
373 culture supernatants suggest that BPS is not bound to the cell surface and is instead secreted into

374 the extracellular milieu (32). The combined effect of a sheet of EPS glycolalyces from adjacent  
375 cells could thus be to electrostatically and/or sterically exclude secreted anionic BPS and  
376 concentrate it at EPS-free zones between cell layers. It may then be in these levels of a swarm  
377 where BPS may fully activate (destabilize) the EPS of adjoining cells, allowing for efficient  
378 T4P-mediated swarm expansion. This could also explain why no Ruthenium Red-stained  
379 structures could be detected in EPS<sup>-</sup> swarms (**Fig. 4**) (17), i.e. the absence of EPS resulted in no  
380 exclusion boundaries at which BPS could accumulate. In this manner, the lumen of swarm-edge  
381 microchannels would still contain EPS material, but the surrounding Ruthenium Red-binding  
382 wall structures would contain BPS. Ultimately, BPS-dependent stratification in swarm biofilms  
383 appears to play an important role in community organization and expansion.

384 Our data may also shed light on findings regarding the proposed effect of the Wzb  
385 (PhpA) tyrosine phosphatase on *M. xanthus* EPS production (49). Mori and colleagues reported  
386 that a mutant lacking this Wzb tyrosine phosphatase possessed higher levels of phosphorylated  
387 (i) BYK protein WzeS (BtkA) and (ii) the BYK domain-containing WzcB (BtkB) (49). These  
388 proteins are now known to be a part of the MASC and BPS assembly pathways, respectively (32,  
389 33, 47). Wzb-deficient cells also exhibited faster auto-aggregation in cuvettes compared to WT  
390 cells, and were able to aggregate earlier in development resulting in faster fruiting body  
391 formation (49). Finally, the amount of Trypan Blue dye bound by Wzb-deficient cells was 134%  
392 that of WT cells (49). Accounting for these and other data, the authors concluded that PhpA may  
393 have a negative regulatory effect on EPS biosynthesis (49). However, based on (i) the  
394 demonstrated dephosphorylation of BPS-pathway WzcB by this Wzb tyrosine phosphatase (49),  
395 (ii) the faster auto-aggregation of BPS<sup>-</sup> cells (**Fig. 2A,B**), (iii) the more efficient formation of  
396 fruiting bodies by BPS<sup>-</sup> swarms (32), and (iv) the marginally higher amount of Trypan Blue

397 bound by BPS<sup>-</sup> cells relative to WT (**Fig. 2D**) (32), the findings for Wzb-deficient vegetative  
398 cells are more in line with a deficiency in BPS production rather than an increase in EPS  
399 production. With respect to direct effects of Wzb on the EPS biosynthesis pathway, it remains to  
400 be seen whether the Wzb tyrosine phosphatase (which already acts on WzcB and WzeS) also  
401 acts on the recently-identified WzeX BYK shown to be essential for EPS biosynthesis (32). To  
402 date, the manner by which the Dif chemosensory pathway regulates EPS production is unknown  
403 (18). Nonetheless, regulation of the putative phosphorylation state of WzeX is an attractive  
404 target for understanding changes in EPS levels during the *M. xanthus* lifecycle.

## 405 MATERIALS AND METHODS

### 406 *Bacterial Cell Culture*

407 The *M. xanthus* strains used in this study are listed in **Table 1**. They were grown and  
408 maintained at 32 °C on Casitone-yeast extract (CYE) agar plates or in CYE liquid medium at 32  
409 °C on a rotary shaker at 220 rpm. The *Escherichia coli* strains used for plasmid construction  
410 were grown and maintained at 37 °C on LB agar plates or in LB liquid medium. Plates contained  
411 1.5% agar (BD Difco).

412

### 413 *Phenotypic Analysis*

414 Exponentially-growing cells were harvested and resuspended in TPM buffer (10 mM  
415 Tris-HCl, pH 7.6, 8 mM MgSO<sub>4</sub> and 1 mM KH<sub>2</sub>PO<sub>4</sub>) at the final concentration of OD<sub>600</sub> 5.0 for  
416 gliding, T4P-dependent expansion, and developmental assays. This cell suspension (5 µL) was  
417 spotted onto CYE 1.5% agar, CYE 0.5% agar, or CF 1.5% agar for gliding flare, T4P-dependent  
418 swarm expansion, or developmental (i.e. fruiting body formation) analysis, respectively. Plates  
419 were incubated at 32 °C for 30 h for gliding flares, 72 h for T4P-dependent swarm expansion,  
420 and 75 h for fruiting body formation, then photographed with an Olympus SZX16 stereoscope  
421 with UC90 4K camera. Gliding flares were imaged using the 2× objective at 8× zoom, using  
422 linear colour, with illumination control wheel set halfway between the brightfield cartridge and  
423 the open slot on the illumination wheel. For T4P-dependent motility, swarms were imaged using  
424 the 0.5× objective at 1× zoom, using linear colour and darkfield illumination. For fruiting bodies,  
425 structures were imaged using the 0.5× objective at 2× zoom, using high-quality colour and  
426 oblique illumination.

427

428 ***Transmission Electron Microscopy***

429 For T4P visualization, a 50  $\mu$ L drop of overnight liquid culture was transferred to a  
430 copper grid and incubated at ambient temperature for 5 min. Grids were then dried with  
431 bibulous paper, stained with 3% PTA (pH 6.0) (Mecalab) for 2 s, and dried again with bibulous  
432 paper. For swarm biofilm cross-sections, swarm samples were fixed in 2.5% glutaraldehyde in  
433 cacodylate buffer at pH 7.4 with 0.2M sucrose overnight and then washed three times with  
434 cacodylate buffer. Then post-fixed in 1.33% osmium tetroxide in Collidine buffer (pH 7.4) for 1  
435 h and stained with 5 mM Ruthenium Red for 1 h at ambient temperature. After dehydration by  
436 successive passages through 25, 50, 75, 95% and 100% (twice) solutions of ethanol in water (for  
437 30 min each), samples were immersed for 16–18 h in Spurr:acetone (1:1 v/v). Samples were then  
438 embedded in Spurr resin (TedPella) before incubation at 60–65 °C for 20–30 h. After  
439 polymerization, samples were sectioned (90 – 150 nm) using an ultramicrotome (LKB Brooma -  
440 2128 Ultratome). Sections were collected on formvar / carbon-coated copper 200-mesh grids.  
441 Samples were stained with 5% uranyl acetate in 50% ethanol for 15 minutes followed by lead  
442 citrate for 5 minutes. Imaging for T4P and swarm biofilm cross-sections was carried out using a  
443 Hitachi H-7100 transmission electron microscope with AMT XR-111 camera.

444

445 ***Scanning Electron Microscopy***

446 Glass coverslip discs were first washed in 100% EtOH for 1h and left to dry at RT under  
447 sterile conditions. The cleaned discs were immersed for 1h at RT in 0.01% poly-L-lysine  
448 solution and allowed to dry. Discs were placed one per well in a 24-well polystyrene cell-  
449 repellent plate and overlaid with 2 mL of overnight CYE bacterial cultures. Plates were then  
450 covered, sealed with Parafilm, and incubated overnight with shaking at 32 °C. After incubation,

451 the media was removed and the cells attached to the coverslips were fixed in 1 mL of 2.5%  
452 glutaraldehyde in 0.1 M cacodylate buffer (pH 7.4) for at least 1 h and washed three times in 1  
453 mL of 0.2 M cacodylate buffer for 5 min. After post-fixation in 500  $\mu$ L of 1.33% osmium  
454 tetroxide (in 0.2 M cacodylate buffer) for 1 h, bacteria were dehydrated with increasing ethanol  
455 concentrations (25, 50, 75, 95 and 100%). From the 100% EtOH bath, coverslips were critical-  
456 point-dried using CO<sub>2</sub> (Leica EM ACE600), coated with 3 nm gold/palladium (Leica CPD300)  
457 and examined with a JEOL JSM-7400F scanning electron microscope (3 kV-LEI detector).

458

### 459 *Single-Cell Gliding Motility Analysis*

460 For phase-contrast microscopy on agar pads, cells from exponentially-growing cultures  
461 were sedimented and resuspended in TPM buffer (OD<sub>600</sub> 0.7), spotted (3  $\mu$ L) on a glass  
462 coverslip, and overlaid with a 1.5% agar pad prepared with TPM buffer. For motility analysis,  
463 cells were left to adhere for 5 min prior to imaging at 32 °C. Images were obtained using an  
464 Axio Observer 7 microscope, with a Plan Apochromat 40 $\times$  1.3 oil objective VIS-IR M27 (for  
465 total magnification 400 $\times$ ), an Axiocam 512 as camera, and a TL LED as light source (Zeiss).  
466 Images were taken at 30 s intervals. The microscope was operated using the Zen 2.6 Pro software  
467 suite (Zeiss).

468 Prior to analysis, image stacks were treated in FIJI as follows to optimize tracking: *Step*  
469 *1*: Enhance Contrast (0.3%), Normalize, Process All Slices. *Step 2*: Subtract Background  
470 (Rolling ball radius of 15.0 pixels, Light background, Process all slices). *Step 3*: Image  
471 alignment in stack via StackReg (Translation) plug-in. Cell gliding speeds were then calculated  
472 using the MicrobeJ module for FIJI (104): *Step 1*: Under the Bacteria tab, Tracking Parameters  
473 were adjusted (Max Entropy, Medial Axis, Area: 18-800, Length: 10-max, Width: 1.5-max),



474 with only cells tracked for a minimum lifespan of 20 frames used for analysis. *Step 2:*  
475 Automatically-detected objects were manually curated to remove instances of object merging,  
476 background artifact detection, and reference cell switching, followed by comparison of Velocity  
477 Means (pixels/frame). *Step 3:* Gliding speeds were converted to “ $\mu\text{m}/\text{min}$ ”. Reversals of gliding  
478 direction for these tracked cells were manually counted, with a minimum displacement of  $\sim 75\%$   
479 of cell length considered a reversal.

480

### 481 *Polymertropism Testing*

482 Aspect ratio (AR) vs. time analyses were modified from a published report (84) and were  
483 performed as previously described (85). Cells of *M. xanthus* (grown in CYE at  $28^\circ\text{C}$  to  $\sim 5 \times$   
484  $10^8$  cells/mL) were sedimented ( $4000 \times g$ , 10 min), then resuspended in CYE broth to  $5 \times 10^9$   
485 cells/mL, and used to inoculate (4  $\mu\text{L}$ ) compressed and uncompressed round 85 mm CTTYE  
486 agar plates. An  $\sim 1$  cm length of 5.56 mm outer-diameter Tygon tubing was inserted against the  
487 plate wall to compress the agar (84), with cells on these plates inoculated 43 mm from the  
488 inserted tubing. Following incubation at  $30^\circ\text{C}$  for 24, 52, 90, 120, and 144 h, colony perimeters  
489 were marked at each interval. The AR of each swarm was then calculated for each time point by  
490 taking the quotient of the colony width and colony height; a round swarm will produce an AR  
491 near-or-equal to one, whereas an elongated swarm will produce an  $\text{AR} > 1$ . For each replicate  
492 dataset, linear best-fit lines were plotted, followed by determination of the slope (i.e.  $\text{AR}/\text{time}$ ).  
493 Average slope values were calculated for each strain and normalized as a percentage of the  
494  $\text{AR}/\text{time}$  for the WT strain.

495

496

497 ***Auto-Aggregation Testing***

498           Using a modified version of an auto-aggregation protocol (60), overnight *M. xanthus*  
499 cultures (10 mL) were sedimented in 15 mL conical tubes (4000 × g, 5 min), followed by  
500 resuspension of pellets in TPM buffer (10 mL) and OD<sub>600</sub> determination using disposable  
501 cuvettes. Specific resuspension volumes were aspirated and sedimented in a microfuge tube  
502 (4000 × g, 5 min); pellets were resuspended in 1 mL CYE broth or TPM buffer to a final OD<sub>600</sub>  
503 of 0.5, followed by transfer to a polystyrene spectrophotometer cuvette. Samples were  
504 vigorously aspirated/ejected in the cuvette for 10 s using a p200 micropipette, followed by  
505 immediate reading of the OD<sub>600</sub> ( $t = 0$ ). Subsequent OD<sub>600</sub> readings were obtained at 10 min  
506 intervals up to 150 min of monitoring. Finally, all OD<sub>600</sub> readings were normalized to the OD<sub>600</sub>  
507 determined at  $t = 0$  for each sample.

508

509 ***Cell-Surface Hydrophobicity Testing***

510           To analyze relative differences in cell-surface hydrophobicity, we employed a modified  
511 version of the classic microbial adhesion to hydrocarbons (MATH) assay (71, 72). Based on the  
512 OD<sub>600</sub> of *M. xanthus* overnight cultures (12.5 mL CYE) measured via NanoDrop 2000c  
513 spectrophotometer (Thermo), sufficient culture volume was removed, sedimented (6000 × g, 5  
514 min) in 2 mL conical tubes, followed by pellet resuspension in 4 mL fresh CYE medium via  
515 using a p1000 micropipette to a final OD<sub>600</sub> of 1.0. The OD<sub>600</sub> of the equilibrated 4 mL  
516 resuspensions (i.e. Mix 1) was read in a quartz cuvette. Cell suspensions were then transferred to  
517 a new 15 mL conical tube using a p1000 micropipette, mixed via vortex (maximum speed, 20 s),  
518 then transferred back to the quartz cuvette for OD<sub>600</sub> determination (i.e. Mix 2); this step was  
519 performed as an internal control to ensure that downstream changes in OD<sub>600</sub> were not simply

520 due to further mixing of the sample, particularly for hyper-aggregative strains. Samples were  
521 returned via aspiration with a p1000 micropipette to the same 15 mL conical tube, followed by  
522 addition of 300  $\mu$ L hexadecane (Sigma). To generate emulsions, cell–hydrocarbon mixtures  
523 were blended via vortex (maximum speed, 20 s), then rapidly transferred back to the quartz  
524 cuvette using a p1000 micropipette (i.e. Mix 3). The OD<sub>600</sub> of this resuspension was  
525 immediately determined ( $t = 0$ ), followed by readings at 5 min intervals for the next three data  
526 points. After the initial 15 min of monitoring, emulsion separation was further monitored at 10  
527 min intervals to a final monitoring time of 65 min. All OD<sub>600</sub> readings were normalized to the  
528 initial OD<sub>600</sub> determined for samples at the “Mix 1” stage of processing.

529

### 530 *Trypan Blue Dye Retention*

531 Trypan Blue dye-retention analysis was performed as previously described (32). In brief,  
532 cells grown overnight in CYE cultures were resuspended to OD<sub>600</sub> 1.0 in TPM. Resuspended  
533 cells or a cell-free blank (900  $\mu$ L) were added together with Trypan Blue stock solution (100  $\mu$ L)  
534 to a microfuge tube, then briefly pulsed (1 s) on a vortex mixer. Samples were incubated at room  
535 temperature, in an aluminum foil-covered tube rack, on a rocker platform (1 h) to permit dye  
536 binding by the cells. Samples were then sedimented ( $16\ 000 \times g$ , 5 min), followed by transfer of  
537 the top 900  $\mu$ L of blank or clarified supernatant to a disposable spectrophotometer cuvette.  
538 Using the cell-free “TPM + Trypan Blue” sample, the spectrophotometer was blanked (585 nm).  
539 For each clarified supernatant, the absorbance at the same wavelength ( $A_{585}$ ) was determined.  
540 Absorbance values were then normalized to  $A_{585}$  for the WT sample.

541 **ACKNOWLEDGEMENTS**

542           The authors would like to thank (i) Éric Déziel for insightful discussions and  
543 troubleshooting regarding hydrophobicity testing and (ii) Philippe Constant for valuable input on  
544 biostatistics. A Discovery operating grant (RGPIN-2016-06637) from the Natural Sciences and  
545 Engineering Research Council of Canada and a Discovery Award (2018-1400) from the Banting  
546 Research Foundation fund work in the lab of S.T.I. as well as studentships for F.S. and N.Y.J.;  
547 both are also recipients of graduate studentships from the PROTEO research network. The  
548 funders had no role in study design, data collection and interpretation, or the decision to submit  
549 the work for publication.

550 **REFERENCES**

- 551 1. **Costerton JW, Geesey G, Cheng KJ.** 1978. How bacteria stick. *Sci. Am.* **238**:86-95.
- 552 2. **O'Toole G, Kaplan HB, Kolter R.** 2000. Biofilm formation as microbial development.  
553 *Annu. Rev. Microbiol.* **54**:49-79.
- 554 3. **Zhang Y, Ducret A, Shaevitz J, Mignot T.** 2012. From individual cell motility to  
555 collective behaviors: insights from a prokaryote, *Myxococcus xanthus*. *FEMS Microbiol.*  
556 *Rev.* **36**:149-164.
- 557 4. **Limoli DH, Jones CJ, Wozniak DJ.** 2015. Bacterial extracellular polysaccharides in  
558 biofilm formation and function. *Microbiol. Spectr.* **3**.
- 559 5. **Monds RD, O'Toole GA.** 2009. The developmental model of microbial biofilms: ten  
560 years of a paradigm up for review. *Trends Microbiol.* **17**:73-87.
- 561 6. **Van Gestel J, Vlamakis H, Kolter R.** 2015. Division of labor in biofilms: the ecology of  
562 cell differentiation, p. 67-97, *Microbial Biofilms*.
- 563 7. **Konovalova A, Petters T, Søgaard-Andersen L.** 2010. Extracellular biology of  
564 *Myxococcus xanthus*. *FEMS Microbiol. Rev.* **34**:89-106.
- 565 8. **Islam ST, Mignot T.** 2015. The mysterious nature of bacterial surface (gliding) motility: a  
566 focal adhesion-based mechanism in *Myxococcus xanthus*. *Semin. Cell Dev. Biol.* **46**:143-  
567 154.
- 568 9. **Faure LM, Fiche J-B, Espinosa L, Ducret A, Anantharaman V, Luciano J, Lhospice**  
569 **S, Islam ST, Tréguier J, Sotes M, Kuru E, Van Nieuwenhze MS, Brun Y, Théodoly O,**  
570 **L A, Nollmann M, Mignot T.** 2016. The mechanism of force transmission at bacterial  
571 focal adhesion complexes. *Nature* **539**:530-535.
- 572 10. **Islam ST, My L, Jolivet NY, Belgrave AM, Fleuchot B, Brasseur G, Faure LM,**  
573 **Sharma G, Lemon DJ, Saïdi F, Fiche J-B, Bratton BP, Singer M, Garza AG,**  
574 **Nollmann M, Shaevitz JW, Mignot T.** 2020. CglB adhesins secreted at bacterial focal  
575 adhesions mediate gliding motility. *bioRxiv*:2020.2007.2022.216333.
- 576 11. **Wu SS, Kaiser D.** 1995. Genetic and functional evidence that Type IV pili are required for  
577 social gliding motility in *Myxococcus xanthus*. *Mol. Microbiol.* **18**:547-558.
- 578 12. **Chang Y-W, Rettberg LA, Treuner-Lange A, Iwasa J, Søgaard-Andersen L, Jensen**  
579 **GJ.** 2016. Architecture of the type IVa pilus machine. *Science* **351**:aad2001-2001-  
580 aad2001-2007.
- 581 13. **Kaiser D, Warrick H.** 2014. Transmission of a signal that synchronizes cell movements in  
582 swarms of *Myxococcus xanthus*. *Proc. Natl. Acad. Sci. USA.*

- 583 14. **Curtis PD, Taylor RG, Welch RD, Shimkets LJ.** 2007. Spatial organization of  
584 *Myxococcus xanthus* during fruiting body formation. *J. Bacteriol.* **189**:9126-9130.
- 585 15. **Copenhagen K, Alert R, Wingreen NS, Shaevitz JW.** 2020. Topological defects induce  
586 layer formation in *Myxococcus xanthus* colonies. arXiv.
- 587 16. **Remis JP, Wei D, Gorur A, Zemla M, Haraga J, Allen S, Witkowska HE, Costerton**  
588 **JW, Berleman JE, Auer M.** 2013. Bacterial social networks: structure and composition of  
589 *Myxococcus xanthus* outer membrane vesicle chains. *Environ. Microbiol.* **16**:598-610.
- 590 17. **Berleman JE, Zemla M, Remis JP, Liu H, Davis AE, Worth AN, West Z, Zhang A,**  
591 **Park H, Bosneaga E, van Leer B, Tsai W, Zusman DR, Auer M.** 2016.  
592 Exopolysaccharide microchannels direct bacterial motility and organize multicellular  
593 behavior. *ISME J.*
- 594 18. **Pérez-Burgos M, Søgaard-Andersen L.** 2020. Biosynthesis and function of cell-surface  
595 polysaccharides in the social bacterium *Myxococcus xanthus*. *Biol. Chem. (advance*  
596 **online):n/a.**
- 597 19. **Kottel RH, Bacon K, Clutter D, White D.** 1975. Coats from *Myxococcus xanthus*:  
598 characterization and synthesis during myxospore differentiation. *J. Bacteriol.* **124**:550-557.
- 599 20. **Wartel M, Ducret A, Thutupalli S, Czerwinski F, Le Gall A-V, Mauriello EMF,**  
600 **Bergam P, Brun YV, Shaevitz J, Mignot T.** 2013. A versatile class of cell surface  
601 directional motors gives rise to gliding motility and sporulation in *Myxococcus xanthus*.  
602 *PLoS Biol.* **11**:e1001728.
- 603 21. **Fink JM, Zissler JF.** 1989. Defects in motility and development of *Myxococcus xanthus*  
604 lipopolysaccharide mutants. *J. Bacteriol.* **171**:2042-2048.
- 605 22. **Bowden MG, Kaplan HB.** 1998. The *Myxococcus xanthus* lipopolysaccharide O-antigen  
606 is required for social motility and multicellular development. *Mol. Microbiol.* **30**:275-284.
- 607 23. **Pérez-Burgos M, García-Romero I, Jung J, Valvano MA, Søgaard-Andersen L.** 2019.  
608 Identification of the lipopolysaccharide O-antigen biosynthesis priming enzyme and the O-  
609 antigen ligase in *Myxococcus xanthus*: critical role of LPS O-antigen in motility and  
610 development. *Mol. Microbiol.* **112**:1178-1198.
- 611 24. **Ducret A, Valignat M-P, Mouhamar F, Mignot T, Theodoly O.** 2012. Wet-surface-  
612 enhanced ellipsometric contrast microscopy identifies slime as a major adhesion factor  
613 during bacterial surface motility. *Proc. Natl. Acad. Sci. USA* **109**:10036-10041.
- 614 25. **Ducret A, Fleuchot B, Bergam P, Mignot T.** 2013. Direct live imaging of cell-cell  
615 protein transfer by transient outer membrane fusion in *Myxococcus xanthus*. *eLife*  
616 **2**:e00868.

- 617 26. **Li Y, Sun H, Ma X, Lu A, Lux R, Zusman D, Shi W.** 2003. Extracellular  
618 polysaccharides mediate pilus retraction during social motility of *Myxococcus xanthus*.  
619 Proc. Natl. Acad. Sci. USA. **100**:5443-5448.
- 620 27. **Palsdottir H, Remis JP, Schaudinn C, O'Toole E, Lux R, Shi W, McDonald KL,**  
621 **Costerton JW, Auer M.** 2009. Three-dimensional macromolecular organization of  
622 cryofixed *Myxococcus xanthus* biofilms as revealed by electron microscopic tomography.  
623 J. Bacteriol. **191**:2077-2082.
- 624 28. **Smaldone GT, Jin Y, Whitfield DL, Mu AY, Wong EC, Wuertz S, Singer M.** 2014.  
625 Growth of *Myxococcus xanthus* in continuous-flow-cell bioreactors as a method for  
626 studying development. Appl. Environ. Microbiol. **80**:2461-2467.
- 627 29. **Hu W, Lux R, Shi W.** 2013. Analysis of exopolysaccharides in *Myxococcus xanthus* using  
628 confocal laser scanning microscopy, p. 121-131. In Delcour AH (ed.), Bacterial Cell  
629 Surfaces: Methods and Protocols. Humana Press, Totowa, NJ.
- 630 30. **Hu W, Wang J, McHardy I, Lux R, Yang Z, Li Y, Shi W.** 2012. Effects of  
631 exopolysaccharide production on liquid vegetative growth, stress survival, and stationary  
632 phase recovery in *Myxococcus xanthus*. J. Microbiol. **50**:241-248.
- 633 31. **Wang J, Hu W, Lux R, He X, Li Y, Shi W.** 2011. Natural transformation of *Myxococcus*  
634 *xanthus*. J. Bacteriol. **193**:2122-2132.
- 635 32. **Islam ST, Vergara Alvarez I, Saïdi F, Guiseppi A, Vinogradov E, Sharma G,**  
636 **Espinosa L, Morrone C, Brasseur G, Guillemot J-F, Benarouche A, Bridot J-L,**  
637 **Ravicoularamin G, Cagna A, Gauthier C, Singer M, Fierobe H-P, Mignot T,**  
638 **Mauriello EMF.** 2020. Modulation of bacterial multicellularity via spatio-specific  
639 polysaccharide secretion. PLOS Biol. **18**:e3000728.
- 640 33. **Pérez-Burgos M, García-Romero I, Jung J, Schander E, Valvano MA, Søggaard-**  
641 **Andersen L.** 2020. Characterization of the exopolysaccharide biosynthesis pathway in  
642 *Myxococcus xanthus*. J. Bacteriol.:JB.00335-00320.
- 643 34. **Pérez-Burgos M, García-Romero I, Valvano MA, Søggaard-Andersen L.** 2020.  
644 Identification of the Wzx flippase, Wzy polymerase and sugar-modifying enzymes for  
645 spore coat polysaccharide biosynthesis in *Myxococcus xanthus*. Mol. Microbiol. **113**:1189-  
646 1208.
- 647 35. **Islam ST, Lam JS.** 2014. Synthesis of bacterial polysaccharides via the Wzx/Wzy-  
648 dependent pathway. Can. J. Microbiol. **60**:697-716.
- 649 36. **Islam ST, Taylor VL, Qi M, Lam JS.** 2010. Membrane topology mapping of the O-  
650 antigen flippase (Wzx), polymerase (Wzy), and ligase (WaaL) from *Pseudomonas*  
651 *aeruginosa* PAO1 reveals novel domain architectures. mBio **1**:e00189-00110.
- 652 37. **Liu D, Cole RA, Reeves PR.** 1996. An O-antigen processing function for Wzx (RfbX): a  
653 promising candidate for O-unit flippase. J. Bacteriol. **178**:2102-2107.

- 654 38. **Islam ST, Fieldhouse RJ, Anderson EM, Taylor VL, Keates RAB, Ford RC, Lam JS.** 2012. A cationic lumen in the Wzx flippase mediates anionic O-antigen subunit  
655 translocation in *Pseudomonas aeruginosa* PAO1. *Mol. Microbiol.* **84**:1165-1176.  
656
- 657 39. **Islam ST, Eckford PDW, Jones ML, Nugent T, Bear CE, Vogel C, Lam JS.** 2013.  
658 Proton-dependent gating and proton uptake by Wzx support O-antigen-subunit antiport  
659 across the bacterial inner membrane. *mBio* **4**:e00678-00613.
- 660 40. **Islam ST, Lam JS.** 2013. Wzx flippase-mediated membrane translocation of sugar  
661 polymer precursors in bacteria. *Environ. Microbiol.* **15**:1001-1015.
- 662 41. **Woodward R, Yi W, Li L, Zhao G, Eguchi H, Sridhar PR, Guo H, Song JK, Motari**  
663 **E, Cai L, Kelleher P, Liu X, Han W, Zhang W, Ding Y, Li M, Wang PG.** 2010. *In vitro*  
664 bacterial polysaccharide biosynthesis: defining the functions of Wzy and Wzz. *Nat. Chem.*  
665 *Biol.* **6**:418-423.
- 666 42. **Islam ST, Gold AC, Taylor VL, Anderson EM, Ford RC, Lam JS.** 2011. Dual  
667 conserved periplasmic loops possess essential charge characteristics that support a catch-  
668 and-release mechanism of O-antigen polymerization by Wzy in *Pseudomonas aeruginosa*  
669 PAO1. *J. Biol. Chem.* **286**:20600-20605.
- 670 43. **Islam ST, Huszczyński SM, Nugent T, Gold AC, Lam JS.** 2013. Conserved-residue  
671 mutations in Wzy affect O-antigen polymerization and Wzz-mediated chain-length  
672 regulation in *Pseudomonas aeruginosa* PAO1. *Sci. Rep.* **3**:3441.
- 673 44. **Cuthbertson L, Mainprize IL, Naismith JH, Whitfield C.** 2009. Pivotal roles of the  
674 outer membrane polysaccharide export and polysaccharide copolymerase protein families  
675 in export of extracellular polysaccharides in Gram-negative bacteria. *Microbiol. Mol. Biol.*  
676 *Rev.* **73**:155-177.
- 677 45. **Kato T, Shirakawa Y, Takegawa K, Kimura Y.** 2015. Functional analysis of conserved  
678 motifs in a bacterial tyrosine kinase, BtkB, from *Myxococcus xanthus*. *J. Biochem.*  
679 **158**:385-392.
- 680 46. **Kimura Y, Kato T, Mori Y.** 2012. Function analysis of a bacterial tyrosine kinase, BtkB,  
681 in *Myxococcus xanthus*. *FEMS Microbiol. Lett.* **336**:45-51.
- 682 47. **Kimura Y, Yamashita S, Mori Y, Kitajima Y, Takegawa K.** 2011. A *Myxococcus*  
683 *xanthus* bacterial tyrosine kinase, BtkA, is required for the formation of mature spores. *J.*  
684 *Bacteriol.* **193**:5853-5857.
- 685 48. **Standish AJ, Morona R.** 2014. The role of bacterial protein tyrosine phosphatases in the  
686 regulation of the biosynthesis of secreted polysaccharides. *Antioxid. Redox Signal.*  
687 **20**:2274-2289.
- 688 49. **Mori Y, Maeda M, Takegawa K, Kimura Y.** 2012. PhpA, a tyrosine phosphatase of  
689 *Myxococcus xanthus*, is involved in the production of exopolysaccharide. *Microbiology*  
690 **158**:2546-2555.



- 691 50. **Nickerson NN, Mainprize IL, Hampton L, Jones ML, Naismith JH, Whitfield C.**  
692 2014. Trapped translocation intermediates establish the route for export of capsular  
693 polysaccharides across *Escherichia coli* outer membranes. Proc. Natl. Acad. Sci. USA  
694 **111**:8203-8208.
- 695 51. **Dong C, Beis K, Nesper J, Brunkan-LaMontagne AL, Clarke BR, Whitfield C,**  
696 **Naismith JH.** 2006. Wza the translocon for *E. coli* capsular polysaccharides defines a new  
697 class of membrane protein. Nature **444**:226.
- 698 52. **Yang Z, Geng Y, Xu D, Kaplan HB, Shi W.** 1998. A new set of chemotaxis homologues  
699 is essential for *Myxococcus xanthus* social motility. Mol. Microbiol. **30**:1123-1130.
- 700 53. **Yang Z, Li Z.** 2005. Demonstration of interactions among *Myxococcus xanthus* Dif  
701 chemotaxis-like proteins by the yeast two-hybrid system. Arch. Microbiol. **183**:243-252.
- 702 54. **Lancero HL, Castaneda S, Caberoy NB, Ma X, Garza AG, Shi W.** 2005. Analysing  
703 protein-protein interactions of the *Myxococcus xanthus* Dif signalling pathway using the  
704 yeast two-hybrid system. Microbiology **151**:1535-1541.
- 705 55. **Yang Z, Ma X, Tong L, Kaplan HB, Shimkets LJ, Shi W.** 2000. *Myxococcus xanthus*  
706 *dif* genes are required for biogenesis of cell surface fibrils essential for social gliding  
707 motility. J. Bacteriol. **182**:5793-5798.
- 708 56. **Bellenger K, Ma X, Shi W, Yang Z.** 2002. A CheW homologue is required for  
709 *Myxococcus xanthus* fruiting body development, social gliding motility, and fibril  
710 biogenesis. J. Bacteriol. **184**:5654-5660.
- 711 57. **Black WP, Wang L, Davis MY, Yang Z.** 2015. The orphan response regulator EpsW is a  
712 substrate of the DifE kinase and it regulates exopolysaccharide in *Myxococcus xanthus*.  
713 Sci. Rep. **5**:17831.
- 714 58. **Black WP, Yang Z.** 2004. *Myxococcus xanthus* chemotaxis homologs DifD and DifG  
715 negatively regulate fibril polysaccharide production. J. Bacteriol. **186**:1001-1008.
- 716 59. **Wu SS, Wu J, Kaiser D.** 1997. The *Myxococcus xanthus pilT* locus is required for social  
717 gliding motility although pili are still produced. Mol. Microbiol. **23**:109-121.
- 718 60. **Shimkets LJ.** 1986. Correlation of energy-dependent cell cohesion with social motility in  
719 *Myxococcus xanthus*. J. Bacteriol. **166**:837-841.
- 720 61. **Weimer RM, Creighton C, Stassinopoulos A, Youderian P, Hartzell PL.** 1998. A  
721 chaperone in the HSP70 family controls production of extracellular fibrils in *Myxococcus*  
722 *xanthus*. J. Bacteriol. **180**:5357-5368.
- 723 62. **Yang Z, Geng Y, Shi W.** 1998. A DnaK homolog in *Myxococcus xanthus* is involved in  
724 social motility and fruiting body formation. J. Bacteriol. **180**:218-224.

- 725 63. **Arnold JW, Shimkets LJ.** 1988. Cell surface properties correlated with cohesion in  
726 *Myxococcus xanthus*. J. Bacteriol. **170**:5771-5777.
- 727 64. **Overgaard M, Wegener-Feldbrügge S, Søgaard-Andersen L.** 2006. The orphan  
728 response regulator DigR is required for synthesis of extracellular matrix fibrils in  
729 *Myxococcus xanthus*. J. Bacteriol. **188**:4384-4394.
- 730 65. **Lu A, Cho K, Black WP, Duan X-y, Lux R, Yang Z, Kaplan HB, Zusman DR, Shi W.**  
731 2005. Exopolysaccharide biosynthesis genes required for social motility in *Myxococcus*  
732 *xanthus*. Mol. Microbiol. **55**:206-220.
- 733 66. **Ward MJ, Lew H, Zusman DR.** 2000. Social motility in *Myxococcus xanthus* requires  
734 FrzS, a protein with an extensive coiled-coil domain. Mol. Microbiol. **37**:1357-1371.
- 735 67. **Rosenbluh A, Eisenbach M.** 1992. Effect of mechanical removal of pili on gliding  
736 motility of *Myxococcus xanthus*. J. Bacteriol. **174**:5406-5413.
- 737 68. **Shi W, Yang Z, Sun H, Lancero H, Tong L.** 2000. Phenotypic analyses of frz and dif  
738 double mutants of *Myxococcus xanthus*. FEMS Microbiol. Lett. **192**:211-215.
- 739 69. **Zhou T, Nan B.** 2017. Exopolysaccharides promote *Myxococcus xanthus* social motility  
740 by inhibiting cellular reversals. Mol. Microbiol. **103**:729-743.
- 741 70. **Black WP, Xu Q, Yang Z.** 2006. Type IV pili function upstream of the Dif chemotaxis  
742 pathway in *Myxococcus xanthus* EPS regulation. Mol. Microbiol. **61**:447-456.
- 743 71. **Rosenberg M, Gutnick D, Rosenberg E.** 1980. Adherence of bacteria to hydrocarbons: a  
744 simple method for measuring cell-surface hydrophobicity. FEMS Microbiol. Lett. **9**:29-33.
- 745 72. **Kupfer D, Zusman DR.** 1984. Changes in cell surface hydrophobicity of *Myxococcus*  
746 *xanthus* are correlated with sporulation-related events in the developmental program. J.  
747 Bacteriol. **159**:776-779.
- 748 73. **Kaczorek E, Pacholak A, Zdarta A, Smulek W.** 2018. The impact of biosurfactants on  
749 microbial cell properties leading to hydrocarbon bioavailability increase. Colloids  
750 Interfaces **2**:35.
- 751 74. **Behmlander RM, Dworkin M.** 1991. Extracellular fibrils and contact-mediated cell  
752 interactions in *Myxococcus xanthus*. J. Bacteriol. **173**:7810-7820.
- 753 75. **Kim S-H, Ramaswamy S, Downard J.** 1999. Regulated exopolysaccharide production in  
754 *Myxococcus xanthus*. J. Bacteriol. **181**:1496-1507.
- 755 76. **Dworkin M.** 1999. Fibrils as extracellular appendages of bacteria: their role in contact-  
756 mediated cell-cell interactions in *Myxococcus xanthus*. BioEssays **21**:590-595.
- 757 77. **Behmlander RM, Dworkin M.** 1994. Biochemical and structural analyses of the  
758 extracellular matrix fibrils of *Myxococcus xanthus*. J. Bacteriol. **176**:6295-6303.

- 759 78. **Dana JR, Shimkets LJ.** 1993. Regulation of cohesion-dependent cell interactions in  
760 *Myxococcus xanthus*. J. Bacteriol. **175**:3636-3647.
- 761 79. **Merroun ML, Ben Chekroun K, Arias JM, González-Muñoz MT.** 2003. Lanthanum  
762 fixation by *Myxococcus xanthus*: cellular location and extracellular polysaccharide  
763 observation. Chemosphere **52**:113-120.
- 764 80. **Mauriello EMF, Mignot T, Yang Z, Zusman DR.** 2010. Gliding motility revisited: how  
765 do the myxobacteria move without flagella? Microbiol. Mol. Biol. Rev. **74**:229-249.
- 766 81. **Gloag ES, Turnbull L, Javed MA, Wang H, Gee ML, Wade SA, Whitchurch CB.**  
767 2016. Stigmergy co-ordinates multicellular collective behaviours during *Myxococcus*  
768 *xanthus* surface migration. Sci. Rep. **6**:26005.
- 769 82. **Gloag ES, Turnbull L, Whitchurch CB.** 2015. Bacterial stigmergy: an organising  
770 principle of multicellular collective behaviours of bacteria. Scientifica (Cairo)  
771 **2015**:387342.
- 772 83. **Kearns DB, Campbell BD, Shimkets LJ.** 2000. *Myxococcus xanthus* fibril appendages  
773 are essential for excitation by a phospholipid attractant. Proc. Natl. Acad. Sci. U. S. A.  
774 **97**:11505-11510.
- 775 84. **Fontes M, Kaiser D.** 1999. *Myxococcus* cells respond to elastic forces in their substrate.  
776 Proc. Natl. Acad. Sci. USA **96**:8052-8057.
- 777 85. **Lemon DJ, Yang X, Srivastava P, Luk Y-Y, Garza AG.** 2017. Polymertropism of rod-  
778 shaped bacteria: movement along aligned polysaccharide fibers. Sci. Rep. **7**:7643.
- 779 86. **Lemon DJ, Schutzman DA, Garza AG.** 2018. Bacterial surface spreading is more  
780 efficient on nematically aligned polysaccharide substrates. J. Bacteriol. **200**:e00610-00617.
- 781 87. **Luft JH.** 1971. Ruthenium red and violet. I. Chemistry, purification, methods of use for  
782 electron microscopy and mechanism of action. Anat. Rec. **171**:347-368.
- 783 88. **Burchard RP.** 1975. Myxospore induction in a nondispersed growing mutant of  
784 *Myxococcus xanthus*. J. Bacteriol. **122**:302-306.
- 785 89. **MacRae TH, McCurdy HD.** 1976. Evidence for motility-related fimbriae in the gliding  
786 microorganism *Myxococcus xanthus*. Can. J. Microbiol. **22**:1589-1593.
- 787 90. **Sun H, Zusman DR, Shi W.** 2000. Type IV pilus of *Myxococcus xanthus* is a motility  
788 apparatus controlled by the *frz* chemosensory system. Curr. Biol. **10**:1143-1146.
- 789 91. **Hu W, Hossain M, Lux R, Wang J, Yang Z, Li Y, Shi W.** 2011. Exopolysaccharide-  
790 independent social motility of *Myxococcus xanthus*. PLoS ONE **6**:e16102.

- 791 92. **Guzzo M, Agrebi R, Espinosa L, Baronian G, Molle V, Mauriello EMF, Brochier-**  
792 **Armanet C, Mignot T.** 2015. Evolution and design governing signal precision and  
793 amplification in a bacterial chemosensory pathway. *PLoS Genet.* **11**:e1005460.
- 794 93. **Tréguier J, Bugnicourt L, Gay G, Diallo M, Islam ST, Toro A, David L, Théodoly O,**  
795 **Sudre G, Mignot T.** 2019. Chitosan films for microfluidic studies of single bacteria and  
796 perspectives for antibiotic susceptibility testing. *mBio* **10**:e01375-01319.
- 797 94. **Mercier R, Mignot T.** 2016. Regulations governing the multicellular lifestyle of  
798 *Myxococcus xanthus*. *Curr. Opin. Microbiol.* **34**:104-110.
- 799 95. **Fassel TA, Edmiston Jr. CE.** 1999. Ruthenium red and the bacterial glycocalyx. *Biotech.*  
800 *Histochem.* **74**:194-212.
- 801 96. **Hanke DE, Northcote DH.** 1975. Molecular visualization of pectin and DNA by  
802 ruthenium red. *Biopolymers* **14**:1-17.
- 803 97. **Charuk JHM, Pirraglia CA, Reithmeier RAF.** 1990. Interaction of ruthenium red with  
804 Ca<sup>2+</sup>-binding proteins. *Anal. Biochem.* **188**:123-131.
- 805 98. **Voelker D, Smejtek P.** 1996. Adsorption of ruthenium red to phospholipid membranes.  
806 *Biophys. J.* **70**:818-830.
- 807 99. **Sutherland IW, Thomson S.** 1975. Comparison of polysaccharides produced by  
808 *Myxococcus* strains. *J. Gen. Microbiol.* **89**:124-132.
- 809 100. **Gibiansky ML, Hu W, Dahmen KA, Shi W, Wong GCL.** 2013. Earthquake-like  
810 dynamics in *Myxococcus xanthus* social motility. *Proc. Natl. Acad. Sci. USA* **110**:2330-  
811 2335.
- 812 101. **Hu W, Li L, Sharma S, Wang J, McHardy I, Lux R, Yang Z, He X, Gimzewski JK, Li**  
813 **Y, Shi W.** 2012. DNA builds and strengthens the extracellular matrix in *Myxococcus*  
814 *xanthus* biofilms by interacting with exopolysaccharides. *PLOS ONE* **7**:e51905.
- 815 102. **MacLean L, Perry MB, Nossova L, Kaplan H, Vinogradov E.** 2007. The structure of  
816 the carbohydrate backbone of the LPS from *Myxococcus xanthus* strain DK1622.  
817 *Carbohydr. Res.* **342**:2474-2480.
- 818 103. **Curtis PD, Atwood J, Orlando R, Shimkets LJ.** 2007. Proteins associated with the  
819 *Myxococcus xanthus* extracellular matrix. *J. Bacteriol.* **189**:7634-7642.
- 820 104. **Ducret A, Quardokus EM, Brun YV.** 2016. MicrobeJ, a tool for high throughput  
821 bacterial cell detection and quantitative analysis. *Nat. Microbiol.* **1**:16077.  
822
- 823

824 **FIGURE LEGENDS**

825 **Figure 1. (A)** Motility and developmental phenotypes for various mutants with altered levels of  
826 secreted polysaccharides. Top panels (upper): gliding motility flares on CYE 1.5% agar after 30  
827 h (scale bar: 50  $\mu$ m). Top panels (lower): magnified view of white hatched box in corresponding  
828 upper panel showing furrows in the agar substratum containing transiting cell groups (scale bar:  
829 10  $\mu$ m). Arrowheads ( $\triangleright$ ) indicate furrows in the agar left by previously-transited cells and/or  
830 cell groups, revealed by extreme oblique illumination of agar surface. Middle panels: T4P-  
831 dependent swarm spreading on CYE 0.5% agar after 72 h (scale bar: 2 mm). Bottom panels:  
832 fruiting body formation on CF 1.5% agar after 75 h (scale bar: 1 mm). **(B)** Bar graphs of  
833 diameters of swarms grown on CYE 0.5% agar for T4P-dependent motility at 72 h. For each  
834 strain, the mean value of 3 biological replicates ( $\pm$  SEM) is plotted. Asterisks (\*) denote  
835 datasets displaying statistically significant differences ( $p < 0.0001$ ) relative to both WT and  
836  $\Delta difG$  strains, as determined via unpaired two-tailed Student's t-test analyses.

837  
838 **Figure 2.** Auto-aggregation profiles of WT,  $EPS^- (\Delta wzaX)$ ,  $BPS^- (\Delta wzaB)$ , and  $\Omega pilA$  strains  
839 resuspended in **(A)** CYE rich medium (mean values of 6, 6, 6, and 5 biological replicates [ $\pm$   
840 SEM], respectively) and **(B)** TPM minimal buffer (mean values of 3 biological replicates [ $\pm$   
841 SEM]). **(C)** Representative transmission electron micrographs of WT,  $BPS^- (\Delta wzaB)$ , and  $EPS^-$   
842 ( $\Delta wzaX$ ) cells on copper grids, taken at 10 000 $\times$  magnification (scale bar: 500 nm). Arrowheads  
843 ( $\triangleright$ ) denote thin (likely single) T4P filaments. Arrows ( $\Rightarrow$ ) denote thick (likely bundled) T4P  
844 filaments. Asterisks (\*) denote cell poles. **(D)** Boxplots of Trypan Blue dye retention to indicate  
845 the levels of EPS production in various strains relative to WT. The lower and upper boundaries  
846 of the boxes correspond to the 25<sup>th</sup> and 75<sup>th</sup> percentiles, respectively. The median (line through

847 centre of boxplot) and mean (+) of each dataset are indicated. Lower and upper whiskers  
848 represent the 10<sup>th</sup> and 90<sup>th</sup> percentiles, respectively; data points above and below the whiskers are  
849 drawn as individual points. Asterisks denote datasets displaying statistically significant  
850 differences in distributions ( $p < 0.05$ ) shifted higher (\*\*) or lower (\*) than WT, as determined via  
851 Wilcoxon signed-rank test performed relative to “100”. Data for  $\Delta difE$  and  $\Delta difG$  was  
852 heretofore unreported and acquired at the same time as the published values for other strains  
853 (32), reproduced with permission. (E) Microbial adhesion to hydrocarbons (MATH) test of WT  
854 and BPS<sup>-</sup> ( $\Delta wzaB$ ) strain binding to hexadecane; values are the mean of 3 biological replicates  
855 (+/- SEM). Mix 1, initial pellet resuspension in CYE; Mix 2, supplemental control mixing; Mix  
856 3, mixing upon addition of hexadecane ( $t = 0$ ). Asterisk (\*) denotes dataset displaying  
857 statistically significant difference in time point mean value ( $p = 0.0176$ ) compared to WT, as  
858 determined via unpaired Student’s t test. (F) Scanning electron micrographs of WT, EPS<sup>-</sup>  
859 ( $\Delta wzaX$ ), and BPS<sup>-</sup> ( $\Delta wzaB$ ) cells, taken at 20 000 $\times$  magnification (scale bar: 1.0  $\mu\text{m}$ ). Arrows  
860 denote EPS fibrils connecting cells. Arrowheads denote potential surface-associated fibril  
861 material not engaged in inter-cell connections.

862

863 **Figure 3.** (A) Violin plots of single-cell gliding event speeds for WT, EPS<sup>-</sup> ( $\Delta wzaX$ ), and BPS<sup>-</sup>  
864 ( $\Delta wzaB$ ) cells on 1.5% agar pads ( $n = 2298$  events across 4 biological replicates). A gliding  
865 event was defined as an instance of continuous translocation in a given direction. Cessation of  
866 motion by a given cell, followed by either a resumption of gliding in the same direction or a  
867 reversal of gliding direction, was considered the beginning of a new gliding event. The lower  
868 and upper boundaries of the plots correspond to the minimum and maximum values of the  
869 dataset, with the 25<sup>th</sup> and 75<sup>th</sup> percentiles displayed (*thick hatched black lines*). The median

870 (*solid black line*) and mean (+) of each dataset are indicated. Asterisks denote datasets displaying  
871 statistically significant differences in distributions ( $p < 0.0001$ ) between (\*) WT and EPS<sup>-</sup>/BPS<sup>-</sup>  
872 cells, as well as between (\*\*) EPS<sup>-</sup> and BPS<sup>-</sup> cells, as determined via unpaired two-tailed Mann-  
873 Whitney test. **(B)** Boxplots of reversals per minute for tracked WT, EPS<sup>-</sup>, and BPS<sup>-</sup> single cells  
874 on 1.5% agar pads (n = 1135 cells across 4 biological replicates). The lower and upper  
875 boundaries of the boxes correspond to the 25<sup>th</sup> and 75<sup>th</sup> percentiles, respectively. The median  
876 (line through centre of boxplot) and mean (+) of each dataset are indicated. Lower and upper  
877 whiskers represent the 10<sup>th</sup> and 90<sup>th</sup> percentiles, respectively; data points above and below the  
878 whiskers are drawn as individual points. Asterisks denote datasets displaying statistically  
879 significant differences in distributions between (\*) WT and EPS<sup>-</sup> cells ( $p = 0.0424$ ), (\*\*) WT  
880 and BPS<sup>-</sup> cells ( $p < 0.0001$ ), and (\*\*\*) EPS<sup>-</sup> and BPS<sup>-</sup> cells ( $p < 0.0001$ ), as determined via  
881 unpaired two-tailed Mann-Whitney tests. **(C)** Violin plots of polymertropism responses for WT,  
882 EPS<sup>-</sup> ( $\Delta wzaX$ ), and BPS<sup>-</sup> ( $\Delta wzaB$ ) polysaccharide secretion mutant strains. The lower and upper  
883 boundaries of the plots correspond to the minimum and maximum values of the dataset, with the  
884 25<sup>th</sup> and 75<sup>th</sup> percentiles displayed (*thick hatched black lines*). The median (*solid black line*) and  
885 mean (+) of each dataset are indicated. Asterisks denote datasets displaying statistically  
886 significant differences in distributions between (\*) WT and BPS<sup>-</sup> swarms ( $p = 0.0006$ ) and (\*\*)   
887 EPS<sup>-</sup> and BPS<sup>-</sup> swarms ( $p = 0.0232$ ), whereas distributions between WT and EPS<sup>-</sup> swarms were  
888 not significantly different ( $p = 0.0845$ ), as determined via unpaired two-tailed Mann-Whitney  
889 test. The number of biological replicates ( $n$ ) used to analyze each strain as follows: WT (11),  
890  $\Delta wzaX$  (10),  $\Delta wzaB$  (10).

891

892 **Figure 4.** TEM analysis of Ruthenium Red-stained transverse sections cut from WT, MASC<sup>-</sup>  
893 ( $\Delta wzaS$ ), BPS<sup>-</sup> ( $\Delta wzaB$ ), and EPS<sup>-</sup> ( $\Delta wzaX$ ) swarms. Left-side panels, *inset*: relative position of  
894 sample sectioning prior to TEM. Left-side panels: wide-angle views at 4000 $\times$  magnification of  
895 internal swarm architecture. For reference, the agar substratum and the apical face of the swarm  
896 were located at the bottom and top (respectively) of each image. Scale bar: 1  $\mu$ m. Right-side  
897 panels: magnified views (20 000 $\times$ ) of the corresponding zone within white hatched boxes in the  
898 left-side panels. Scale bar: 100 nm. Arrows ( $\rightarrow$ ) denote wispy putative polysaccharide-like  
899 material. Filled arrowheads ( $\blacktriangleright$ ) denote OMVs. Chevrons ( $>$ ) denote OMV chains.



900 **AUTHOR CONTRIBUTIONS**

901 FS and STI conceived of and planned the study.

902 FS and NYJ performed stereoscopic phenotypic analyses and measured colony surface areas.

903 AN, FS, and NYJ prepared samples for electron microscopy

904 AN, FS, and NYJ performed transmission electron microscopy, while the former two performed  
905 scanning electron microscopy.

906 FS performed dye-binding assays.

907 STI performed auto-aggregation analyses.

908 FS tested strain hydrophobicity.

909 NYJ quantified cell motility and cell reversals.

910 DJL tested polymertropism responses, with analysis by STI and DJL.

911 FS, NYJ, and STI wrote the manuscript.

912 FS, NYJ, and STI generated figures.

913 STI, AGG, and FJV contributed personnel and funding support.

# FIGURE 1

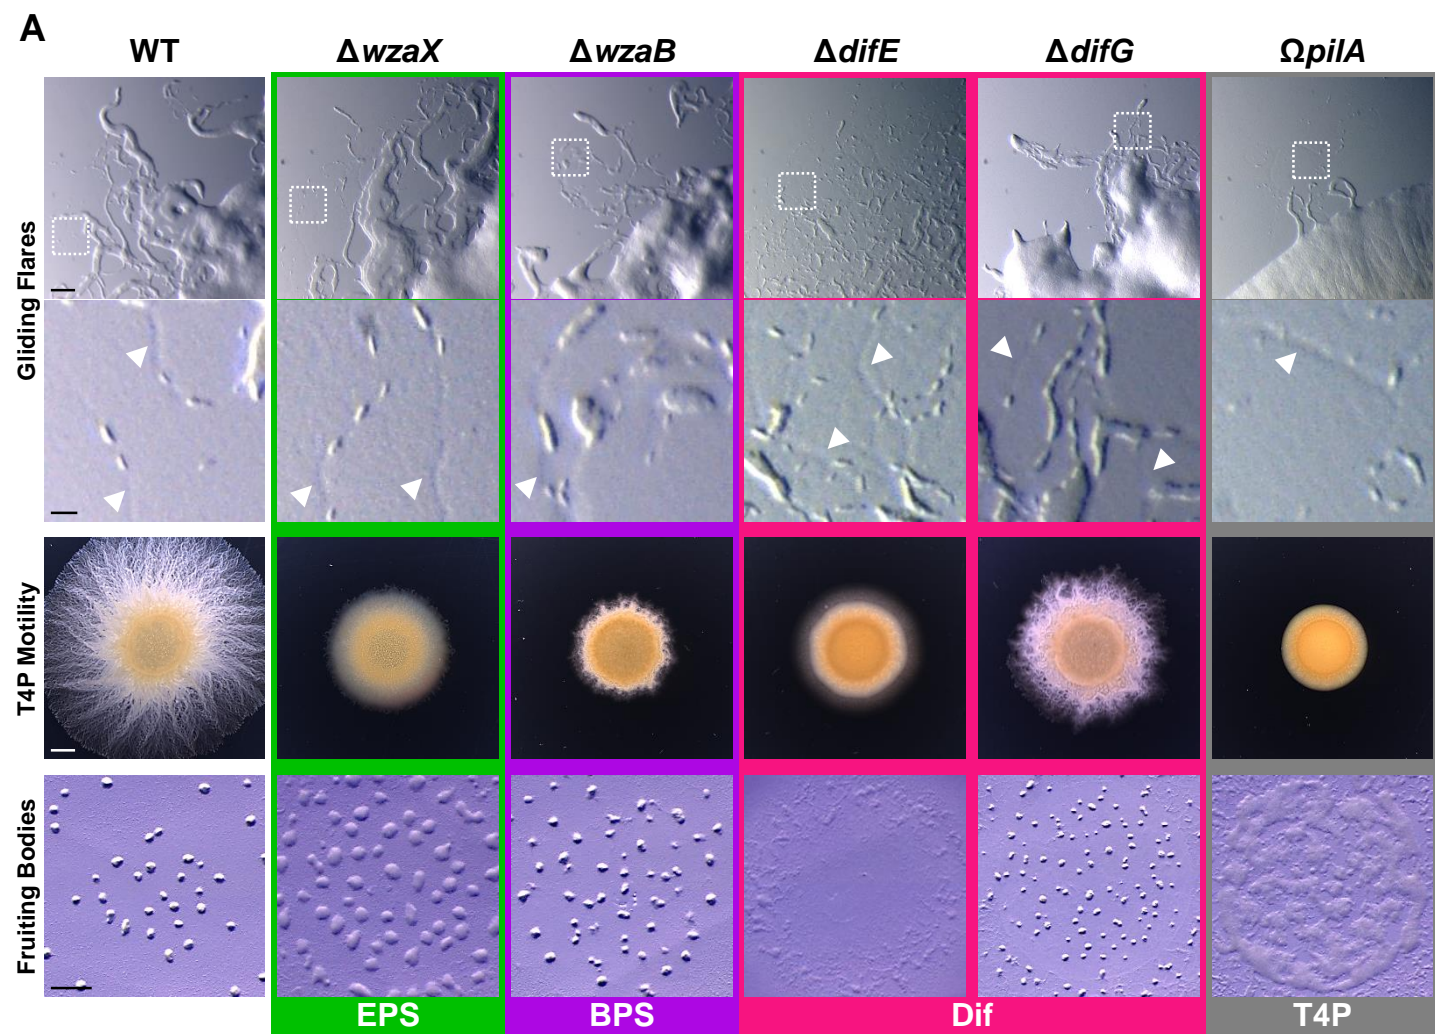

**B**

## T4P-Dependent Swarm Spreading

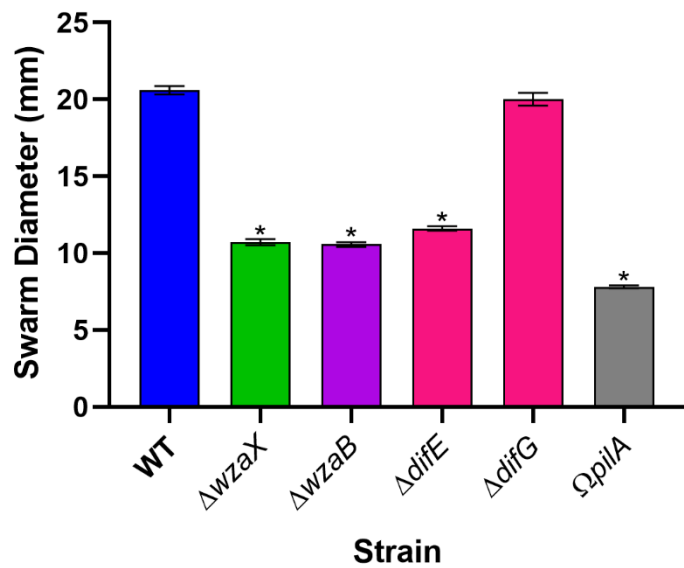

# FIGURE 2

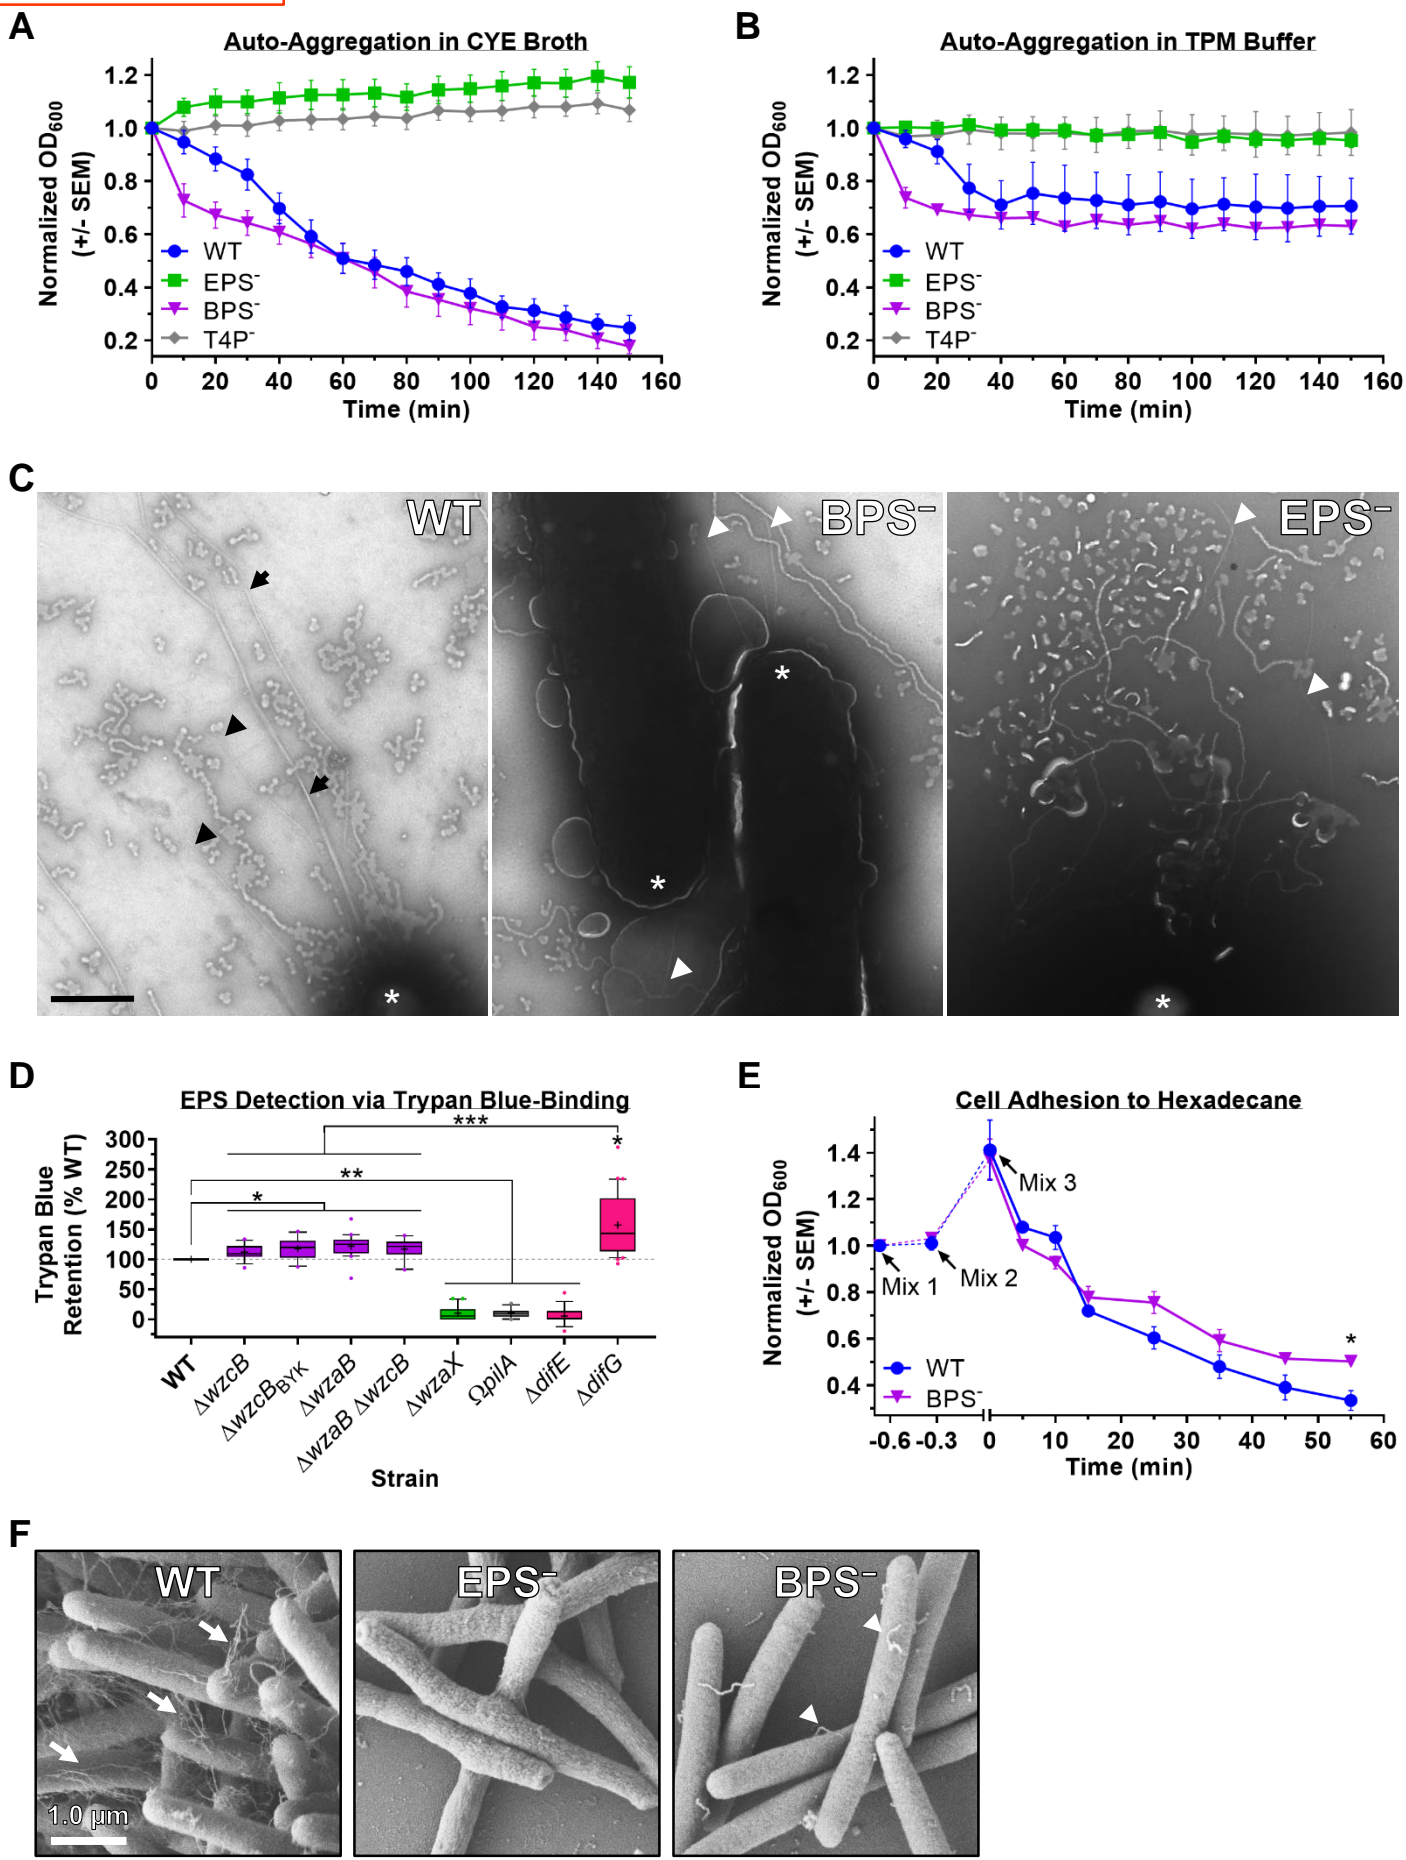

# FIGURE 3

**A**

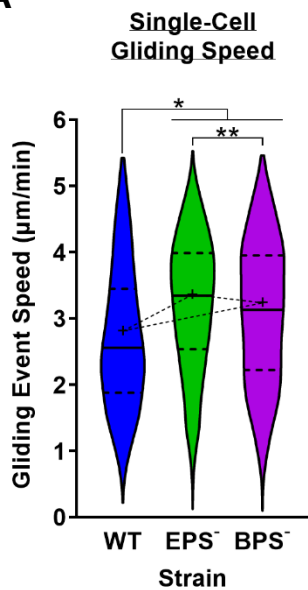

**B**

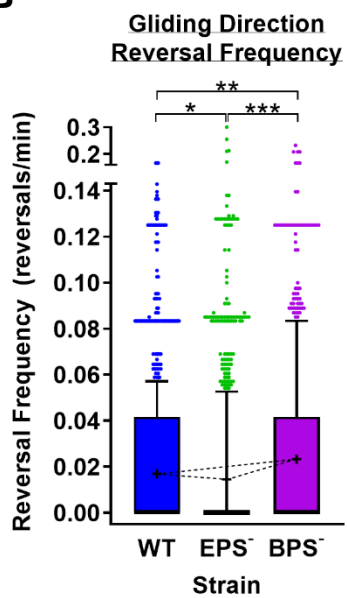

**C**

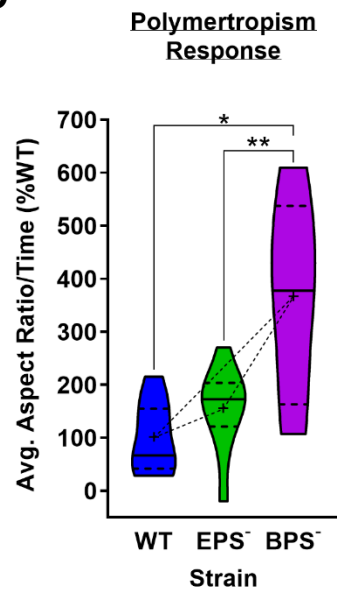

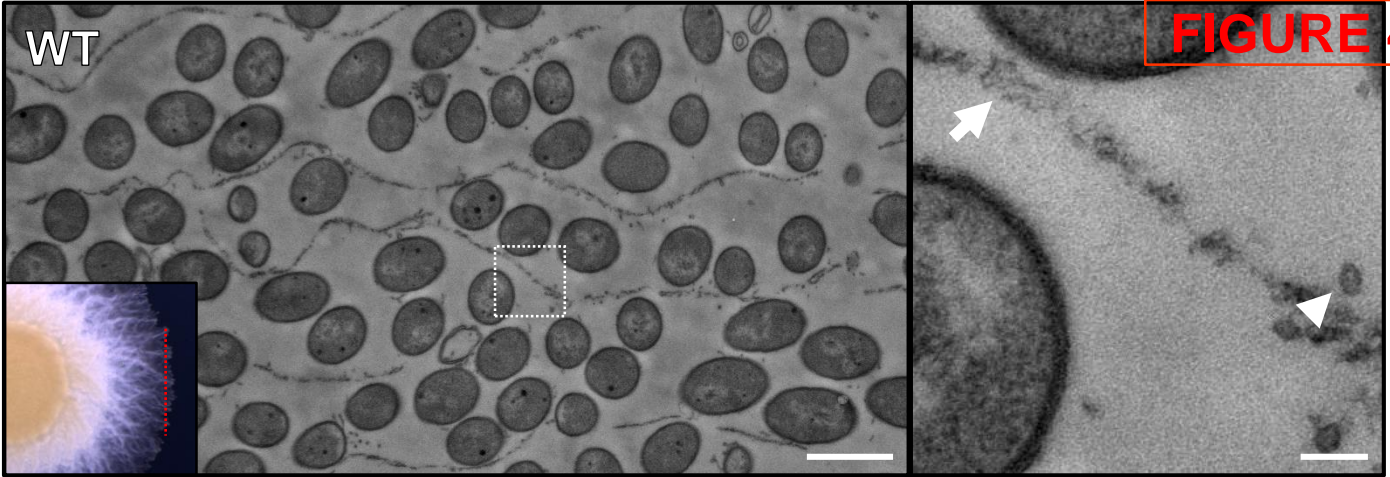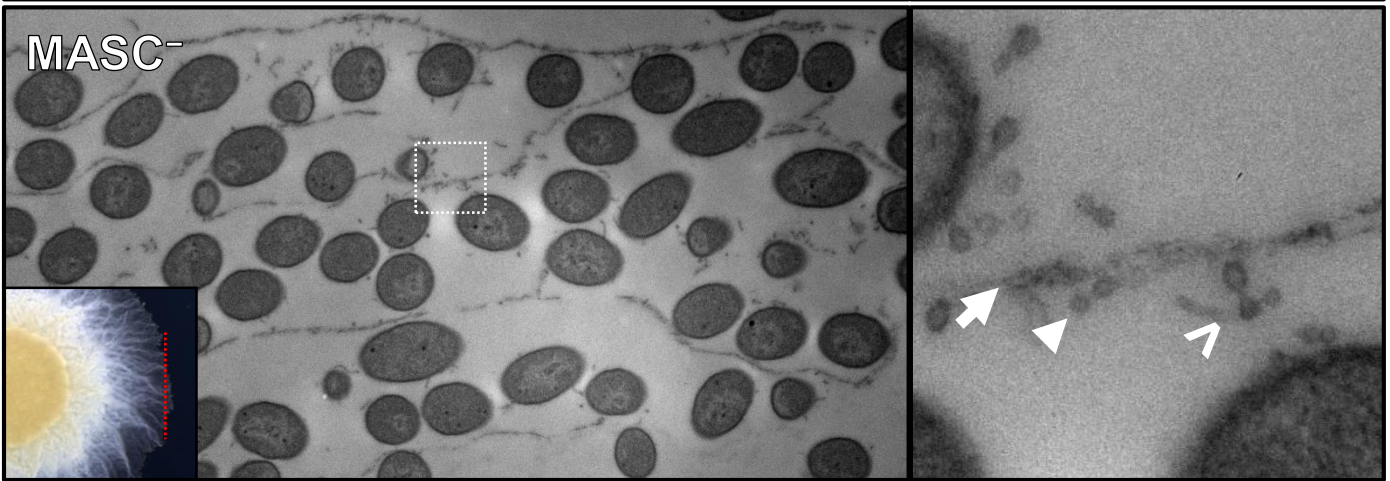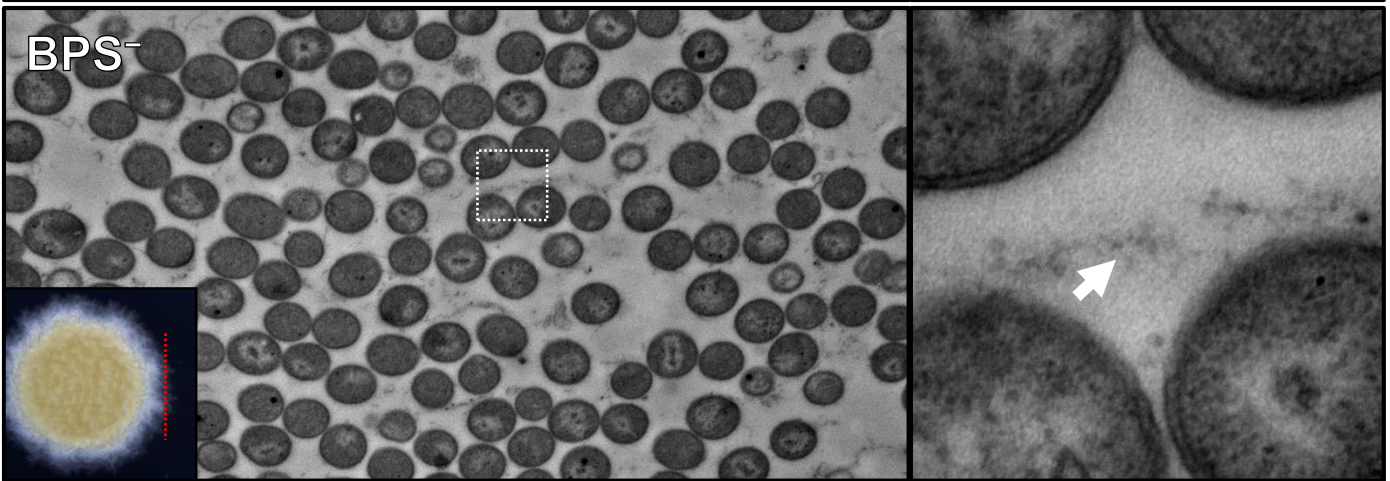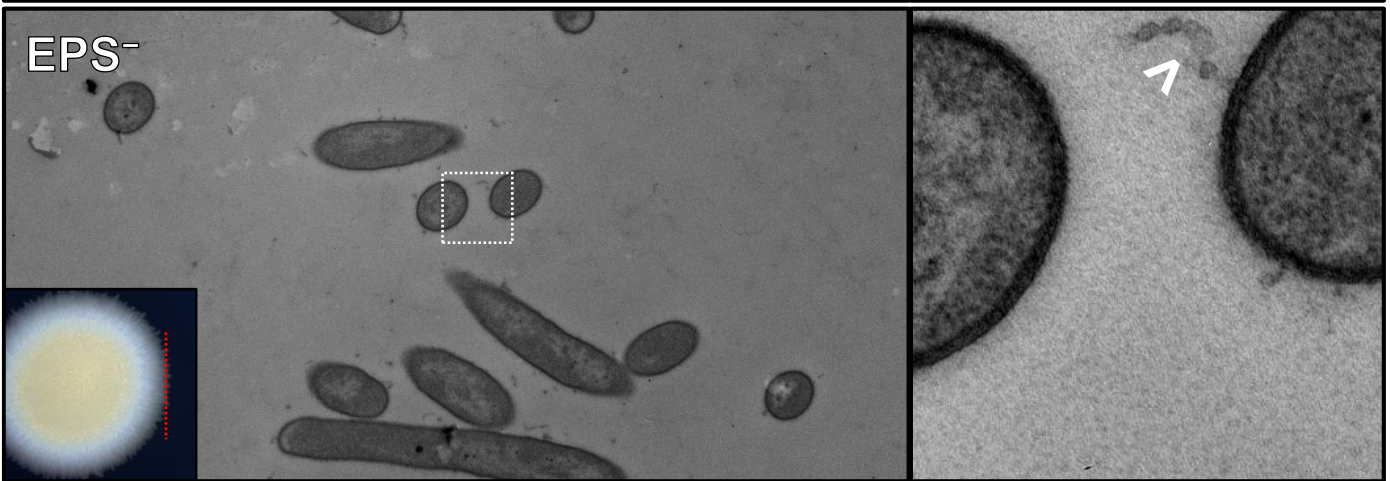

# TABLE 1

| <u>Strain Code</u> | <u>Strain</u>                 | <u>Genotype/ Description</u>                              | <u>Source or Reference</u> |
|--------------------|-------------------------------|-----------------------------------------------------------|----------------------------|
| TM108              | <i>Myxococcus xanthus</i> DZ2 | Wild type                                                 | Laboratory collection      |
| TM469              | $\Delta wzaX$                 | $\Delta mxan\_7417/epsY$                                  | [1]                        |
| TM484              | $\Delta wzaS$                 | $\Delta mxan\_3225/exoA/fdgA$                             | [1]                        |
| TM529              | $\Delta wzaB$                 | $\Delta mxan\_1915$                                       | [1]                        |
| EM450              | $\Delta difE$                 | $\Delta mxan\_6692$                                       | [2]                        |
| EM451              | $\Delta difG$                 | $\Delta mxan\_6691$                                       | Laboratory collection      |
| TM293              | $\Omega pilA$                 | $\Omega mxan\_5783$ (Tet <sup>R</sup> cassette insertion) | Laboratory collection      |

[1] Ducret A, Valignat M-P, Mouhamar F, Mignot T, Theodoly O. Wet-surface-enhanced ellipsometric contrast microscopy identifies slime as a major adhesion factor during bacterial surface motility. Proc. Natl. Acad. Sci. U. S. A. 2012. 109(25):10036-10041.

[2] Moine A, Agrebi R, Espinosa L, Kirby JR, Zusman DR, Mignot T, Mauriello EMF. Functional organization of a multimodular bacterial chemosensory apparatus. PLOS Genet. 2014. 10(3):e1004164
